# Supplementary material for: Complete Genome Sequencing and Comparative Analysis of the Clinically-Derived Apiotrichum mycotoxinivorans Strain GMU1709
Source: Frontiers journal article supplement (doi:10.3389/fcimb.2022.834015), 2022-02-04
Supplement: Table_3.xls [file Table_3.xls]

## Sheet: A. mycotoxinivorans strains PHI
PHI ID	A. mycotoxinovorans CICC 1454	A. mycotoxinovorans GMU1709	T. cutaneum ACCC 20271	Mutant Phenotype	Disease	Host description	Host species	Ref. Source	PMID	DOI	Year
PHI:9092	13	11	13	reduced virulence	Salmonellosis	Rodents	Mus musculus (related: house mouse)	Pubmed	29447698	10.1016/j.chom.2018.01.004	2018
PHI:267	11	11	11	reduced virulence	Candidiasis	Rodents	Mus musculus (related: house mouse)	PubMed	11929516	no data found	2002
PHI:9423	11	10	11	reduced virulence	Cryptococcal meningitis	Rodents	Mus musculus (related: house mouse)	Pubmed	31311883	10.1128/mBio.01440-19	2019
PHI:7520	10	10	10	unaffected pathogenicity	Pneumonia	Rodents	Mus musculus (related: house mouse)	Pubmed	28861522	10.1128/mSphere.00341-17	2017
PHI:7620	9	9	9	increased virulence (hypervirulence)	Listeriosis	Primates	Homo sapiens (related: human)	Pubmed	25590644	10.1080/15476286.2014.996099	2015
PHI:6510	9	9	9	unaffected pathogenicity	Listeriosis	Primates	Homo sapiens (related: human)	Pubmed	26483402	10.1128/IAI.00849-15	2015
PHI:511	8	10	8	reduced virulence	Candidiasis	Rodents	Mus musculus (related: house mouse)	PubMed	12076781	10.1111/j.1574-6968.2002.tb11238.x	2002
PHI:7207	6	6	6	unaffected pathogenicity	Fungal meningitis	Rodents	Mus musculus (related: house mouse)	Pubmed	28559486	10.1128/mBio.00595-17	2017
PHI:3415	6	6	6	reduced virulence	Fungal meningitis	Rodents	Mus musculus (related: house mouse)	Pubmed	24478097	10.1128/IAI.01357-13	2014
PHI:2570	6	6	6	reduced virulence	Candidiasis	Rodents	Mus musculus (related: house mouse)	Pubmed	21931845	10.1371/journal.pone.0024759	2011
PHI:2822	6	6	6	reduced virulence		Rodents	Mus musculus (related: house mouse)	Pubmed	18347023	10.1074/jbc.M708927200	2008
PHI:9082	5	6	6	reduced virulence	Invasive pulmonary aspergillosis	Rodents	Mus musculus (related: house mouse)	Pubmed	30880633	10.1080/21505594.2019.1596505	2019
PHI:11030	5	5	5	reduced virulence	Pneumonic plague	Primates	Homo sapiens (related: human)	Pubmed	33257531	10.1128/IAI.00673-20	2021
PHI:10892	5	5	5	unaffected pathogenicity	Fungal meningitis	Rodents	Mus musculus (related: house mouse)	Pubmed	33114434	10.3390/pathogens9110881	2020
PHI:3688	5	5	5	unaffected pathogenicity	Disseminated candidiasis	Birds	Gallus gallus (related: chicken)	Pubmed	23758791	10.1111/1567-1364.12057	2013
PHI:47	5	5	5	loss of pathogenicity	Cryptococcosis	Rodents	Mus musculus (related: house mouse)	PubMed	8675296	no data found	1996
PHI:423	5	5	5	reduced virulence	Cryptococcosis	Rodents	Mus musculus (related: house mouse)	PubMed	15765146	10.1172/JCI200523048	2005
PHI:8901	5	4	5	unaffected pathogenicity	Invasive pulmonary aspergillosis	Rodents	Mus musculus (related: house mouse)	Pubmed	30862750	10.1128/mBio.02563-18	2019
PHI:3416	4	5	4	reduced virulence	Fungal meningitis	Rodents	Mus musculus (related: house mouse)	Pubmed	24478097	10.1128/IAI.01357-13	2014
PHI:513	4	5	4	reduced virulence	Candidiasis	Primates	Homo sapiens (related: human)	PubMed	12183576	10.1128/IAI.70.9.5246-5255.2002	2002
PHI:7511	4	4	4	unaffected pathogenicity	Pneumonia	Rodents	Mus musculus (related: house mouse)	Pubmed	28861522	10.1128/mSphere.00341-17	2017
PHI:8011	4	4	4	reduced virulence	Gastric infections	Rodents	Mus musculus (related: house mouse)	Pubmed	29588407	10.1128/mBio.02071-17	2018
PHI:9897	4	4	4	unaffected pathogenicity	Urinary tract infection	Rodents	Mus musculus (related: house mouse)	Pubmed	31900139	10.1186/s12929-019-0605-y	2020
PHI:6268	4	4	4	reduced virulence	Urinary tract infection	Rodents	Mus musculus (related: house mouse)	Pubmed	27073089	10.1128/mBio.00104-16	2016
PHI:9271	4	4	4	reduced virulence	Disseminated candidiasis	Rodents	Mus musculus (related: house mouse)	Pubmed	31138567	10.1128/AAC.00886-19	2019
PHI:10485	4	4	4	reduced virulence	Opportunistic infection	Flies	Drosophila melanogaster (related: fruit fly)	Pubmed	32178243	10.3390/microorganisms8030395	2020
PHI:9230	4	3	4	unaffected pathogenicity	Avian colisepticemia	Rodents	Mus musculus (related: house mouse)	Pubmed	31046828	10.1186/s13567-019-0650-2	2019
PHI:9838	4	3	3	reduced virulence	Infection	Flies	Drosophila melanogaster (related: fruit fly)	Pubmed	30224439	10.1128/JB.00380-18	2018
PHI:3630	4	3	3	increased virulence (hypervirulence)	Tuberculosis	Rodents	Mus musculus (related: house mouse)	Pubmed	12368431	10.1099/00221287-148-10-2975	2002
PHI:10607	4	3	3	unaffected pathogenicity	Opportunistic infection	Rodents	Mus musculus (related: house mouse)	Pubmed	32406921	10.1093/nar/gkaa377	2020
PHI:5059	3	3	3	unaffected pathogenicity	Infection	Rodents	Mus musculus (related: house mouse)	Pubmed	26313907	10.1371/journal.ppat.1005129	2015
PHI:599	3	3	3	reduced virulence	Cryptococcosis	Rodents	Mus musculus (related: house mouse)	PubMed	16672377	10.1091/mbc.E06-02-0113	2006
PHI:6265	3	3	3	reduced virulence	Histoplasmosis	Rodents	Mus musculus (related: house mouse)	Pubmed	27094334	10.1128/mBio.01388-15	2016
PHI:3236	3	3	3	reduced virulence	Fungal meningitis	Rodents	Mus musculus (related: house mouse)	Pubmed	25227465	10.1128/mBio.01649-14	2014
PHI:397	3	3	3	unaffected pathogenicity	Cryptococcosis	Rodents	Mus musculus (related: house mouse)	PubMed	15643074	10.1128/EC.4.1.190-201.2005	2005
PHI:2638	3	3	3	reduced virulence	Invasive pulmonary aspergillosis	Rodents	Mus musculus (related: house mouse)	Pubmed	23028460	10.1371/journal.pone.0043559	2012
PHI:8715	3	3	3	loss of pathogenicity	Disseminated candidiasis	Rodents	Mus musculus (related: house mouse)	Pubmed	30507002	10.1111/mmi.14176	2018
PHI:6556	3	3	3	reduced virulence	Invasive pulmonary aspergillosis	Rodents	Mus musculus (related: house mouse)	Pubmed	26787716	10.1128/IAI.01124-15	2016
PHI:10571	3	3	3	reduced virulence	Toxoplasmosis	Primates	Homo sapiens (related: human)	Pubmed	32463830	10.1371/journal.ppat.1008106	2020
PHI:9188	3	3	3	unaffected pathogenicity	Infectious bronchitis	Rodents	Rattus rattus (related: black rat)	Pubmed	31019000	10.1128/mSphere.00093-19	2019
PHI:9425	3	3	2	reduced virulence	Cryptococcal meningitis	Rodents	Mus musculus (related: house mouse)	Pubmed	31311883	10.1128/mBio.01440-19	2019
PHI:3528	3	3	2	reduced virulence	Cryptococcosis	Rodents	Mus musculus (related: house mouse)	Pubmed	24711572	10.1128/IAI.01607-14	2014
PHI:2562	3	2	3	reduced virulence	Candidiasis	Rodents	Mus musculus (related: house mouse)	Pubmed	19908200	10.1002/yea.1733	2010
PHI:5267	3	2	2	increased virulence (hypervirulence)	Invasive pulmonary aspergillosis	Rodents	Mus musculus (related: house mouse)	Pubmed	26492565	10.1371/journal.ppat.1005187	2015
PHI:4610	3	2	2	reduced virulence	Contagious agalactia	Primates	Homo sapiens (related: human)	Pubmed	25799063	10.1371/journal.pone.0119706	2015
PHI:270	2	3	2	loss of pathogenicity	Candidiasis	Rodents	Mus musculus (related: house mouse)	PubMed	12702298	10.1111/j.1567-1364.2002.tb00075.x	2002
PHI:9461	2	3	2	reduced virulence	Salmonellosis	Rodents	Mus musculus (related: house mouse)	Pubmed	31447308	10.1016/j.chom.2019.08.001	2019
PHI:8768	2	2	2	reduced virulence	Fungal meningitis	Rodents	Mus musculus (related: house mouse)	Pubmed	30602579	10.1128/mBio.01726-18	2019
PHI:8693	2	2	2	loss of pathogenicity	Disseminated candidiasis	Rodents	Mus musculus (related: house mouse)	Pubmed	30476034	10.1093/femsyr/foy124	2018
PHI:3453	2	2	2	reduced virulence	Cryptococcosis	Rodents	Mus musculus (related: house mouse)	Pubmed	25477510	10.1074/jbc.M114.607705	2014
PHI:6476	2	2	2	reduced virulence	Pulmonary aspergillosis	Rodents	Mus musculus (related: house mouse)	Pubmed	27446037	10.3389/fmicb.2016.00997	2016
PHI:420	2	2	2	loss of pathogenicity	Meningoencephalitis	Rodents	Mus musculus (related: house mouse)	PubMed	15752200	10.1111/j.1365-2958.2005.04503.x	2005
PHI:7047	2	2	2	unaffected pathogenicity	Fungal meningitis	Rodents	Mus musculus (related: house mouse)	Pubmed	28251810	10.1111/1758-2229.12527	2017
PHI:8716	2	2	2	loss of pathogenicity	Disseminated candidiasis	Rodents	Mus musculus (related: house mouse)	Pubmed	30507002	10.1111/mmi.14176	2018
PHI:7258	2	2	2	reduced virulence	Listeriosis	Rodents	Mus musculus (related: house mouse)	Pubmed	28702378	10.3389/fcimb.2017.00287	2017
PHI:8508	2	2	2	reduced virulence	Chronic septicemia	Birds	Anas platyrhynchos (related: mallard)	Pubmed	30279476	10.1038/s41598-018-32905-1	2018
PHI:3290	2	2	2	reduced virulence	Urinary tract infection	Rodents	Mus musculus (related: house mouse)	Pubmed	25240873	10.1016/j.ijmm.2014.08.013	2014
PHI:8600	2	2	2	unaffected pathogenicity	Fungal meningitis	Rodents	Mus musculus (related: house mouse)	Pubmed	30459196	10.1128/mBio.02087-18	2018
PHI:440	2	2	2	reduced virulence	Candidiasis	Rodents	Mus musculus (related: house mouse)	PubMed	15843378	10.1074/jbc.M502162200	2005
PHI:4785	2	2	2	loss of pathogenicity	Fungal meningitis	Rodents	Mus musculus (related: house mouse)	Pubmed	25970403	10.1371/journal.ppat.1004908	2015
PHI:6585	2	2	2	reduced virulence	Cryptococcosis	Rodents	Mus musculus (related: house mouse)	Pubmed	25862155	10.1128/EC.00010-15	2015
PHI:6892	2	2	2	reduced virulence	Salmonellosis	Rodents	Mus musculus (related: house mouse)	Pubmed	27704705	10.1111/cmi.12680	2016
PHI:3822	2	2	2	reduced virulence	Disseminated candidiasis	Rodents	Mus musculus (related: house mouse)	Pubmed	24114876	10.1074/jbc.M113.505735	2013
PHI:4108	2	2	2	unaffected pathogenicity	Cholera	Rabbits & hares	Oryctolagus cuniculus (related: rabbit)	Pubmed	23918781	10.1128/IAI.00722-13	2014
PHI:9227	2	2	2	unaffected pathogenicity	Avian colisepticemia	Rodents	Mus musculus (related: house mouse)	Pubmed	31046828	10.1186/s13567-019-0650-2	2019
PHI:10476	2	2	2	reduced virulence	Meningoencephalitis	Rodents	Mus musculus (related: house mouse)	Pubmed	32391887	10.1093/femsyr/foaa015	2020
PHI:4987	2	2	2	reduced virulence	Disseminated candidiasis	Rodents	Mus musculus (related: house mouse)	Pubmed	26177944	10.1002/mbo3.274	2015
PHI:7214	2	2	2	reduced virulence	Salmonellosis	Rodents	Mus musculus (related: house mouse)	Pubmed	28575106	10.1371/journal.ppat.1006429	2017
PHI:2563	2	2	2	reduced virulence	Candidiasis	Rodents	Mus musculus (related: house mouse)	Pubmed	17283095	10.1128/IAI.01182-06	2007
PHI:7653	2	2	2	reduced virulence	Invasive pulmonary aspergillosis	Rodents	Mus musculus (related: house mouse)	Pubmed	26605426	10.1080/21505594.2015.1109766	2015
PHI:5554	2	2	2	reduced virulence	Leishmaniasis	Rodents	Mus musculus (related: house mouse)	Pubmed	26728034	10.1186/s13071-015-1284-5	2016
PHI:6732	2	2	2	unaffected pathogenicity	Tuberculosis	Rodents	Mus musculus (related: house mouse)	Pubmed	27513637	10.1371/journal.ppat.1005768	2016
PHI:106	2	2	2	reduced virulence	Candidiasis	Rodents	Mus musculus (related: house mouse)	PubMed	9573075	no data found	1998
PHI:9183	2	2	2	increased virulence (hypervirulence)	Pulmonary aspergillosis	Rodents	Mus musculus (related: house mouse)	Pubmed	31068436	10.1128/mSphere.00244-19	2019
PHI:673	2	2	2	unaffected pathogenicity	Cryptococcosis	Rodents	Mus musculus (related: house mouse)	PubMed	16303560	10.1016/j.cub.2005.09.047	2005
PHI:8036	2	2	2	unaffected pathogenicity		Nematodes	Caenorhabditis elegans (related: roundworm)	Pubmed	29616315	10.1007/s00253-018-8929-1	2018
PHI:10608	2	2	2	unaffected pathogenicity	Opportunistic infection	Rodents	Mus musculus (related: house mouse)	Pubmed	32406921	10.1093/nar/gkaa377	2020
PHI:419	2	2	2	reduced virulence	Candidiasis	Rodents	Mus musculus (related: house mouse)	PubMed	15766793	10.1016/j.femsle.2005.02.010	2005
PHI:6986	2	2	2	reduced virulence	Pneumococcal pneumonia	Rodents	Mus musculus (related: house mouse)	Pubmed	28152394	10.1016/j.molimm.2017.01.021	2017
PHI:3529	2	2	2	increased virulence (hypervirulence)	Cryptococcosis	Rodents	Mus musculus (related: house mouse)	Pubmed	24711572	10.1128/IAI.01607-14	2014
PHI:9334	2	2	2	effector (plant avirulence determinant)	Colitis	Rodents	Mus musculus (related: house mouse)	Pubmed	31251784	10.1371/journal.ppat.1007898	2019
PHI:318	2	2	2	loss of pathogenicity	Meningoencephalitis	Rodents	Mus musculus (related: house mouse)	PubMed	15752200	10.1111/j.1365-2958.2005.04503.x	2005
PHI:26	2	2	2	reduced virulence	Candidiasis	Rodents	Mus musculus (related: house mouse)	PubMed	7591094	no data found	1995
PHI:675	2	2	2	reduced virulence	Cryptococcosis	Rodents	Mus musculus (related: house mouse)	PubMed	16299318	10.1128/IAI.73.12.8219-8225.2005	2005
PHI:2560	2	2	2	reduced virulence	Candidiasis	Rodents	Mus musculus (related: house mouse)	Pubmed	20100876	10.1128/AAC.01364-09	2010
PHI:10282	2	2	2	unaffected pathogenicity	Skin infection; food poisoning; respiratory disease	Primates	Homo sapiens (related: human)	Pubmed	30642903	10.1128/IAI.00884-18	2019
PHI:2968	2	2	2	reduced virulence	Cryptococcal meningoencephalitis	Rodents	Mus musculus (related: house mouse)	Pubmed	23691177	10.1371/journal.pone.0064239	2013
PHI:8590	2	2	2	unaffected pathogenicity	Aspergillosis	Rodents	Mus musculus (related: house mouse)	Pubmed	30483221	10.3389/fmicb.2018.02615	2018
PHI:8863	2	2	2	reduced virulence	Infection	Rodents	Mus musculus (related: house mouse)	Pubmed	30671294	10.7717/peerj.5989	2019
PHI:10606	2	2	2	unaffected pathogenicity	Opportunistic infection	Rodents	Mus musculus (related: house mouse)	Pubmed	32406921	10.1093/nar/gkaa377	2020
PHI:286	2	2	2	reduced virulence	Cryptococcosis	Rodents	Mus musculus (related: house mouse)	PubMed	14622414	no data found	2003
PHI:9873	2	2	2	unaffected pathogenicity	Legionnaires' disease	Primates	Homo sapiens (related: human)	pubmed	28867389	10.1016/j.chom.2017.07.020	2017
PHI:6753	2	2	2	lethal	Invasive pulmonary aspergillosis	Rodents	Mus musculus (related: house mouse)	Pubmed	27649508	10.1371/journal.ppat.1005899	2016
PHI:4891	2	2	2	unaffected pathogenicity	Disseminated candidiasis	Rodents	Mus musculus (related: house mouse)	Pubmed	26087349	10.1016/j.jprot.2015.06.006	2015
PHI:11203	2	2	2	unaffected pathogenicity	Diphtheria	Nematodes	Caenorhabditis elegans (related: roundworm)	Pubmed	33672886	10.3390/microorganisms9020389	2021
PHI:10773	2	2	2	reduced virulence	Prosthetic joint infection	Rodents	Mus musculus (related: house mouse)	Pubmed	32900803	10.1128/mBio.01581-20	2020
PHI:7867	2	2	2	reduced virulence	Fungal meningitis	Rodents	Mus musculus (related: house mouse)	Pubmed	29233914	10.1534/g3.117.300444	2018
PHI:4732	2	2	2	unaffected pathogenicity	Tularemia	Rodents	Mus musculus (related: house mouse)	Pubmed	25999917	10.3389/fmicb.2015.00338	2015
PHI:6075	2	2	2	reduced virulence	Disseminated candidiasis	Rodents	Mus musculus (related: house mouse)	Pubmed	27014229	10.3389/fmicb.2016.00306	2016
PHI:6554	2	2	2	unaffected pathogenicity	Invasive pulmonary aspergillosis	Rodents	Mus musculus (related: house mouse)	Pubmed	26787716	10.1128/IAI.01124-15	2016
PHI:2959	2	2	2	reduced virulence	Enteric septicemia	Bony fishes	Ictalurus punctatus (related: channel catfish)	Pubmed	23762452	10.1371/journal.pone.0065973	2013
PHI:4906	2	2	2	reduced virulence	Disseminated candidiasis	Rodents	Mus musculus (related: house mouse)	Pubmed	25326521	10.1128/EC.00231-14	2014
PHI:3802	2	2	2	reduced virulence		Rodents	Mus musculus (related: house mouse)	Pubmed	23895559	10.1111/febs.12458	2013
PHI:10727	2	2	2	reduced virulence	Gastroenteritis	Rodents	Mus musculus (related: house mouse)	Pubmed	32584649	10.1080/19490976.2020.1770017	2020
PHI:674	2	2	2	unaffected pathogenicity	Cryptococcosis	Rodents	Mus musculus (related: house mouse)	PubMed	16303560	10.1016/j.cub.2005.09.047	2005
PHI:5042	2	2	2	reduced virulence	Opportunistic infection	Nematodes	Caenorhabditis elegans (related: roundworm)	Pubmed	26252386	10.1371/journal.pone.0134229	2015
PHI:8615	2	2	2	loss of pathogenicity	Meningoencephalitis	Rodents	Mus musculus (related: house mouse)	Pubmed	30514787	10.1128/mBio.02377-18	2018
PHI:3459	2	2	2	reduced virulence	Leishmaniasis	Rodents	Mus musculus (related: house mouse)	Pubmed	25521752	10.1371/journal.pntd.0003402	2014
PHI:455	2	2	2	reduced virulence	Cryptococcosis	Nematodes	Caenorhabditis elegans (related: roundworm)	PubMed	12438649	10.1073/pnas.232568599	2002
PHI:228	2	2	1	reduced virulence	Cryptococcosis	Rabbits & hares	Oryctolagus cuniculus (related: rabbit)	PubMed	11123698	no data found	2001
PHI:9057	2	2	1	reduced virulence	Fungal meningitis	Bony fishes	Danio rerio (related: zebrafish)	Pubmed	30921435	10.1371/journal.ppat.1007597	2019
PHI:9874	2	2	1	reduced virulence	Fungal meningitis	Rodents	Mus musculus (related: house mouse)	pubmed	29858266	10.4049/jimmunol.1700958	2018
PHI:7231	2	2	1	reduced virulence	Systemic cryptococcosis	Rodents	Mus musculus (related: house mouse)	Pubmed	15039347	10.1128/IAI.72.4.2229-2239.2004	2004
PHI:2843	2	2	1	reduced virulence		Rodents	Mus musculus (related: house mouse)	Pubmed	21453402	10.1111/j.1365-2958.2011.07632.x	2011
PHI:7259	2	2	1	reduced virulence	Fungal meningitis	Rodents	Mus musculus (related: house mouse)	Pubmed	12595473	10.1128/IAI.71.3.1538-1547.2003	2003
PHI:10536	2	1	2	reduced virulence	Infection	Rodents	Mus musculus (related: house mouse)	Pubmed	32409599	10.1073/pnas.1919683117	2020
PHI:9832	2	1	2	reduced virulence	Leishmaniasis	Rodents	Mus musculus (related: house mouse)	Pubmed	31744234	10.3390/pathogens8040241	2019
PHI:668	2	1	1	reduced virulence	Cryptococcosis	Rodents	Mus musculus (related: house mouse)	PubMed	14614821	no data found	2003
PHI:227	2	1	1	reduced virulence	Cryptococcosis	Flies	Drosophila melanogaster (related: fruit fly)	PubMed	15075271	10.1128/EC.3.2.413-419.2004	2004
PHI:11158	1	5	1	reduced virulence	Cryptococcosis	Rodents	Mus musculus (related: house mouse)	Pubmed	33224112	10.3389/fmicb.2020.570269	2020
PHI:7353	1	2	2	unaffected pathogenicity	Skin infection; food poisoning; respiratory disease	Bony fishes	Danio rerio (related: zebrafish)	Pubmed	28808156	10.1128/IAI.00337-17	2017
PHI:3457	1	2	1	reduced virulence	Cryptococcosis	Rodents	Mus musculus (related: house mouse)	Pubmed	24711572	10.1128/IAI.01607-14	2014
PHI:3915	1	2	1	loss of pathogenicity	Nosocomial infection	Rodents	Mus musculus (related: house mouse)	Pubmed	24169572	10.1128/mBio.00419-13	2013
PHI:6784	1	1	1	reduced virulence	Oral candidiasis	Primates	Homo sapiens (related: human)	Pubmed	10540295	10.1046/j.1365-2958.1999.01590.x	1999
PHI:6096	1	1	1	increased virulence (hypervirulence)	Pneumococcal pneumonia	Rodents	Mus musculus (related: house mouse)	Pubmed	26973817	10.3389/fcimb.2016.00023	2016
PHI:72	1	1	1	reduced virulence	Candidiasis	Rodents	Cavia porcellus (related: domestic guinea pig)	PubMed	9284116	no data found	1997
PHI:6790	1	1	1	loss of pathogenicity	Vaginal candidiasis	Rodents	Rattus rattus (related: black rat)	Pubmed	9841840	10.1086/314546	1999
PHI:6812	1	1	1	unaffected pathogenicity	Peritonitis	Rodents	Mus musculus (related: house mouse)	Pubmed	10569785	no data found	1999
PHI:7925	1	1	1	reduced virulence	Disseminated candidiasis	Primates	Homo sapiens (related: human)	Pubmed	29491142	10.1074/jbc.M117.813741	2018
PHI:9332	1	1	1	reduced virulence	Colitis	Rodents	Mus musculus (related: house mouse)	Pubmed	31251784	10.1371/journal.ppat.1007898	2019
PHI:7863	1	1	1	reduced virulence	Mycosis	Rodents	Mus musculus (related: house mouse)	Pubmed	29358719	10.1038/s41598-018-19453-4	2018
PHI:9402	1	1	1	reduced virulence	Mycosis	Primates	Homo sapiens (related: human)	Pubmed	31434748	10.1128/mSphere.00484-19	2019
PHI:313	1	1	1	reduced virulence	Cryptococcosis	Rodents	Mus musculus (related: house mouse)	PubMed	12787363	10.1046/j.1365-2958.2003.03508.x	2003
PHI:10913	1	1	1	reduced virulence	Septic shock	Primates	Homo sapiens (related: human)	Pubmed	33082376	10.1038/s41598-020-74692-8	2020
PHI:5578	1	1	1	reduced virulence	Tuberculosis	Rodents	Mus musculus (related: house mouse)	Pubmed	26751071	10.1371/journal.ppat.1005351	2016
PHI:125	1	1	1	reduced virulence	Candidiasis	Rodents	Mus musculus (related: house mouse)	PubMed	9284117	no data found	1997
PHI:4155	1	1	1	reduced virulence	Meningitis	Rodents	Mus musculus (related: house mouse)	Pubmed	24637959	10.1371/journal.pone.0091971	2014
PHI:8151	1	1	1	reduced virulence	Meningitis	Rodents	Mus musculus (related: house mouse)	Pubmed	29797543	10.1111/cmi.12862	2018
PHI:3277	1	1	1	unaffected pathogenicity	Invasive pulmonary aspergillosis	Rodents	Mus musculus (related: house mouse)	Pubmed	25309516	10.3389/fmicb.2014.00469	2014
PHI:9264	1	1	1	unaffected pathogenicity	Nosocomial infection	Rodents	Mus musculus (related: house mouse)	Pubmed	31157175	10.3389/fcimb.2019.00160	2019
PHI:10335	1	1	1	loss of pathogenicity	Fungal meningitis	Rodents	Mus musculus (related: house mouse)	Pubmed	32528953	10.3389/fcell.2020.00374	2020
PHI:2810	1	1	1	reduced virulence	Pulmonary cryptococcosis; basal meningitis; cerebral cryptococcomas	Rodents	Mus musculus (related: house mouse)	Pubmed	21249145	10.1371/journal.pone.0016076	2011
PHI:9496	1	1	1	reduced virulence	Infection	Rodents	Mus musculus (related: house mouse)	Pubmed	31487966	10.3390/ijms20184339	2019
PHI:9276	1	1	1	unaffected pathogenicity	Invasive pulmonary aspergillosis	Rodents	Mus musculus (related: house mouse)	Pubmed	31131706	10.1080/21505594.2019.1620063	2019
PHI:8898	1	1	1	reduced virulence	Plague	Rodents	Mus musculus (related: house mouse)	Pubmed	29610260	10.1128/IAI.00224-18	2019
PHI:7938	1	1	1	reduced virulence	Periodontitis	Rodents	Mus musculus (related: house mouse)	Pubmed	29488863	10.1099/mic.0.000640	2018
PHI:6822	1	1	1	reduced virulence	Disseminated candidiasis	Nematodes	Caenorhabditis elegans (related: roundworm)	Pubmed	27932543	10.1534/genetics.116.195024	2016
PHI:7009	1	1	1	reduced virulence	Disseminated candidiasis	Rodents	Mus musculus (related: house mouse)	Pubmed	28192532	10.1371/journal.ppat.1006205	2017
PHI:7305	1	1	1	reduced virulence	Opportunistic infection	Nematodes	Caenorhabditis elegans (related: roundworm)	Pubmed	28715477	10.1371/journal.ppat.1006504	2017
PHI:5344	1	1	1	reduced virulence	Melioidosis	Rodents	Mus musculus (related: house mouse)	Pubmed	26583079	10.3389/fcimb.2015.00078	2015
PHI:62	1	1	1	reduced virulence	Candidiasis	Rodents	Mus musculus (related: house mouse)	PubMed	9308185	10.1099/00221287-143-9-3033	1997
PHI:139	1	1	1	reduced virulence	Cryptococcosis	Rodents	Mus musculus (related: house mouse)	PubMed	10482503	no data found	1999
PHI:4692	1	1	1	reduced virulence	Listeriosis	Rodents	Mus musculus (related: house mouse)	Pubmed	25157076	10.1128/JB.02053-14	2014
PHI:2825	1	1	1	reduced virulence	Disseminated candidiasis	Rodents	Mus musculus (related: house mouse)	Pubmed	16629671	10.1111/j.1365-2958.2006.05121.x	2006
PHI:7755	1	1	1	unaffected pathogenicity	Pulmonary aspergillosis	Rodents	Mus musculus (related: house mouse)	Pubmed	29170805	10.1007/s00294-017-0777-5	2017
PHI:7492	1	1	1	unaffected pathogenicity	Pneumonia	Rodents	Mus musculus (related: house mouse)	Pubmed	28861522	10.1128/mSphere.00341-17	2017
PHI:9164	1	1	1	reduced virulence	Periodontitis	Primates	Homo sapiens (related: human)	Pubmed	31081181	10.1002/jcb.28887	2019
PHI:2322	1	1	1	reduced virulence	Aspergillosis	Rodents	Mus musculus (related: house mouse)	Pubmed	22106303	10.1073/pnas.1106399108	2011
PHI:4844	1	1	1	reduced virulence	Mucormycosis	Rodents	Mus musculus (related: house mouse)	Pubmed	25974051	10.1371/journal.ppat.1004842	2015
PHI:8786	1	1	1	reduced virulence	Pseudomembranous colitis	Rodents	Mus musculus (related: house mouse)	Pubmed	30576368	10.1371/journal.ppat.1007486	2018
PHI:6908	1	1	1	reduced virulence	Invasive pulmonary aspergillosis	Rodents	Mus musculus (related: house mouse)	Pubmed	27706915	10.1111/cmi.12681	2016
PHI:7694	1	1	1	loss of pathogenicity	Invasive pulmonary aspergillosis	Rodents	Mus musculus (related: house mouse)	Pubmed	27652896	10.1080/21505594.2016.1239010	2016
PHI:7229	1	1	1	reduced virulence	Systemic cryptococcosis	Rodents	Mus musculus (related: house mouse)	Pubmed	28642475	10.1038/s41598-017-04290-8	2017
PHI:3207	1	1	1	reduced virulence	Invasive pulmonary aspergillosis	Rodents	Mus musculus (related: house mouse)	Pubmed	25083783	10.1371/journal.pone.0103957	2014
PHI:283	1	1	1	loss of pathogenicity	Candidiasis	Rodents	Mus musculus (related: house mouse)	PubMed	12582118	10.1128/EC.2.1.9-18.2003	2003
PHI:6274	1	1	1	reduced virulence	Opportunistic infection	Rodents	Mus musculus (related: house mouse)	Pubmed	27296966	10.1016/j.micres.2016.05.002	2016
PHI:6469	1	1	1	lethal	Disseminated candidiasis	Rodents	Mus musculus (related: house mouse)	Pubmed	27382059	10.1074/jbc.M115.706044	2016
PHI:825	1	1	1	chemistry target: resistance to chemical	Dermatophytosis	Primates	Homo sapiens (related: human)	PubMed	15980358	10.1128/AAC.49.7.2840-2844.2005	2005
PHI:10246	1	1	1	reduced virulence	Brucellosis	Rodents	Mus musculus (related: house mouse)	Pubmed	30126897	10.1128/IAI.00402-18	2018
PHI:9500	1	1	1	increased virulence (hypervirulence)	Candidiasis	Rodents	Mus musculus (related: house mouse)	Pubmed	29311082	10.1128/AAC.01924-17	2018
PHI:7934	1	1	1	reduced virulence	Disseminated candidiasis	Primates	Homo sapiens (related: human)	Pubmed	29491142	10.1074/jbc.M117.813741	2018
PHI:8028	1	1	1	loss of pathogenicity	Leishmaniasis	Primates	Homo sapiens (related: human)	Pubmed	29554142	10.1371/journal.ppat.1006953	2018
PHI:6468	1	1	1	reduced virulence	Disseminated candidiasis	Rodents	Mus musculus (related: house mouse)	Pubmed	27382059	10.1074/jbc.M115.706044	2016
PHI:461	1	1	1	reduced virulence	Candidiasis	Rodents	Mus musculus (related: house mouse)	PubMed	8917571	10.1073/pnas.93.23.13217	1996
PHI:7817	1	1	1	unaffected pathogenicity	Opportunistic infection	Nematodes	Caenorhabditis elegans (related: roundworm)	Pubmed	29246112	10.1186/s12866-017-1141-0	2017
PHI:3527	1	1	1	reduced virulence	Cryptococcosis	Rodents	Mus musculus (related: house mouse)	Pubmed	24711572	10.1128/IAI.01607-14	2014
PHI:7979	1	1	1	reduced virulence	Infection	Primates	Homo sapiens (related: human)	Pubmed	29500457	10.1038/s41598-018-22300-1	2018
PHI:7195	1	1	1	reduced virulence	Disseminated candidiasis	Rodents	Mus musculus (related: house mouse)	Pubmed	28516956	10.1038/ncomms15482	2017
PHI:7652	1	1	1	reduced virulence	Invasive pulmonary aspergillosis	Rodents	Mus musculus (related: house mouse)	Pubmed	26605426	10.1080/21505594.2015.1109766	2015
PHI:3287	1	1	1	reduced virulence	Disseminated candidiasis	Rodents	Mus musculus (related: house mouse)	Pubmed	25223215	10.1111/cmi.12364	2014
PHI:9509	1	1	1	unaffected pathogenicity	Q fever	Primates	Homo sapiens (related: human)	Pubmed	31527117	10.1042/BCJ20190504	2019
PHI:4644	1	1	1	loss of pathogenicity	Cryptococcosis	Rodents	Mus musculus (related: house mouse)	Pubmed	25732100	10.1111/mmi.12985	2015
PHI:6297	1	1	1	reduced virulence	Fungal meningitis	Rodents	Mus musculus (related: house mouse)	Pubmed	27165800	10.1128/mBio.00478-16	2016
PHI:138	1	1	1	reduced virulence	Candidiasis	Rodents	Mus musculus (related: house mouse)	PubMed	10572127	no data found	1999
PHI:2535	1	1	1	loss of pathogenicity	Invasive pulmonary aspergillosis	Rodents	Mus musculus (related: house mouse)	Pubmed	17352532	10.1371/journal.ppat.0030024	2007
PHI:195	1	1	1	loss of pathogenicity	Candidiasis	Rodents	Mus musculus (related: house mouse)	PubMed	11065354	10.1099/00221287-146-11-2755	2000
PHI:7457	1	1	1	reduced virulence	Invasive pulmonary aspergillosis	Rodents	Mus musculus (related: house mouse)	Pubmed	28489963	10.1080/21505594.2017.1328343	2017
PHI:4211	1	1	1	increased virulence (hypervirulence)		Rodents	Mus musculus (related: house mouse)	Pubmed	24692633	10.1128/mBio.00941-14	2014
PHI:3999	1	1	1	reduced virulence	Skin infection; food poisoning; respiratory disease	Rodents	Mus musculus (related: house mouse)	Pubmed	23571548	10.1128/AAC.00162-13	2013
PHI:6240	1	1	1	reduced virulence	Fungal meningitis	Rodents	Mus musculus (related: house mouse)	Pubmed	27118799	10.1093/mmy/myw013	2016
PHI:2306	1	1	1	unaffected pathogenicity	Aspergillosis	Rodents	Mus musculus (related: house mouse)	Pubmed	22163332	10.1371/journal.pone.0028865	2011
PHI:11207	1	1	1	reduced virulence	Nosocomial infection	Rodents	Mus musculus (related: house mouse)	Pubmed	33668542	10.3390/pathogens10020204	2021
PHI:4556	1	1	1	reduced virulence	Cryptococcosis	Rodents	Mus musculus (related: house mouse)	Pubmed	25675897	10.1111/febs.13229	2015
PHI:8599	1	1	1	unaffected pathogenicity	Fungal meningitis	Rodents	Mus musculus (related: house mouse)	Pubmed	30459196	10.1128/mBio.02087-18	2018
PHI:3512	1	1	1	reduced virulence	Candidiasis	Rodents	Mus musculus (related: house mouse)	Pubmed	20485517	10.1371/journal.ppat.1000889	2010
PHI:7864	1	1	1	reduced virulence	Mycosis	Rodents	Mus musculus (related: house mouse)	Pubmed	29358719	10.1038/s41598-018-19453-4	2018
PHI:4575	1	1	1	increased virulence (hypervirulence)	Fungal meningitis	Rodents	Mus musculus (related: house mouse)	Pubmed	25001408	10.1128/EC.00152-14	2014
PHI:463	1	1	1	increased virulence (hypervirulence)		Rodents	Mus musculus (related: house mouse)	PubMed	9116640	10.1111/j.1574-695X.1996.tb00140.x	1996
PHI:7168	1	1	1	reduced virulence	Invasive pulmonary aspergillosis	Rodents	Mus musculus (related: house mouse)	Pubmed	28467895	10.1016/j.celrep.2017.04.019	2017
PHI:2565	1	1	1	reduced virulence	Candidiasis	Rodents	Mus musculus (related: house mouse)	Pubmed	20817114	10.1016/j.fgb.2010.08.010	2011
PHI:8652	1	1	1	unaffected pathogenicity	Infection	Primates	Homo sapiens (related: human)	Pubmed	30377949	10.1007/s11033-018-4441-z	2018
PHI:9150	1	1	1	unaffected pathogenicity	Colibacillosis	Birds	Gallus gallus (related: chicken)	Pubmed	29519523	10.1016/j.vetmic.2018.01.011	2018
PHI:2510	1	1	1	unaffected pathogenicity	Invasive pulmonary aspergillosis	Rodents	Mus musculus (related: house mouse)	Pubmed	18599824	10.1099/mic.0.2008/017525-0	2008
PHI:6751	1	1	1	increased virulence (hypervirulence)	Invasive pulmonary aspergillosis	Rodents	Mus musculus (related: house mouse)	Pubmed	27649508	10.1371/journal.ppat.1005899	2016
PHI:8877	1	1	1	unaffected pathogenicity	Pulmonary aspergillosis	Rodents	Mus musculus (related: house mouse)	Pubmed	30698898	10.1111/cmi.13013	2019
PHI:436	1	1	1	reduced virulence	Cryptococcosis	Rodents	Mus musculus (related: house mouse)	PubMed	15870468	10.1099/mic.0.27786-0	2005
PHI:213	1	1	1	reduced virulence	Cryptococcosis	Rodents	Mus musculus (related: house mouse)	PubMed	11415984	10.1093/embo-reports/kve109	2001
PHI:2424	1	1	1	reduced virulence	Meningoencephalitis	Rodents	Mus musculus (related: house mouse)	Pubmed	21487010	10.1074/jbc.M111.230268	2011
PHI:9692	1	1	1	reduced virulence	Cryptococcosis	Rodents	Mus musculus (related: house mouse)	Pubmed	31681631	10.3389/fcimb.2019.00355	2019
PHI:693	1	1	1	loss of pathogenicity	Cryptococcosis	Rodents	Mus musculus (related: house mouse)	PubMed	16741577	10.1172/JCI27890	2006
PHI:376	1	1	1	reduced virulence	Cryptococcosis	Rodents	Mus musculus (related: house mouse)	PubMed	15503029	10.1007/s00294-004-0529-1	2004
PHI:7868	1	1	1	reduced virulence	Fungal meningitis	Rodents	Mus musculus (related: house mouse)	Pubmed	29233914	10.1534/g3.117.300444	2018
PHI:3595	1	1	1	reduced virulence	Fungal meningitis	Rodents	Mus musculus (related: house mouse)	Pubmed	24728196	10.1128/EC.00069-14	2014
PHI:19	1	1	1	reduced virulence	Cryptococcosis	Rabbits & hares	Oryctolagus cuniculus (related: rabbit)	PubMed	7991574	no data found	1994
PHI:324	1	1	1	loss of pathogenicity	Cryptococcosis	Rodents	Mus musculus (related: house mouse)	PubMed	15590822	10.1128/EC.3.6.1476-1491.2004	2004
PHI:9541	1	1	1	unaffected pathogenicity	Pulmonary aspergillosis	Rodents	Mus musculus (related: house mouse)	Pubmed	31649650	10.3389/fmicb.2019.02311	2019
PHI:680	1	1	1	reduced virulence	Cryptococcosis	Rodents	Mus musculus (related: house mouse)	PubMed	12455960	10.1128/EC.1.2.257-272.2002	2002
PHI:2527	1	1	1	loss of pathogenicity	Invasive pulmonary aspergillosis	Rodents	Mus musculus (related: house mouse)	Pubmed	17352532	10.1371/journal.ppat.0030024	2007
PHI:6188	1	1	1	reduced virulence	Fungal meningitis	Nematodes	Caenorhabditis elegans (related: roundworm)	Pubmed	27049762	10.1371/journal.pone.0153219	2016
PHI:6976	1	1	1	unaffected pathogenicity	Invasive pulmonary aspergillosis	Rodents	Mus musculus (related: house mouse)	Pubmed	27986720	10.1128/AEM.02924-16	2017
PHI:6561	1	1	1	unaffected pathogenicity	Fungal meningitis	Rodents	Mus musculus (related: house mouse)	Pubmed	26385891	10.1128/EC.00100-15	2015
PHI:7929	1	1	1	reduced virulence	Disseminated candidiasis	Primates	Homo sapiens (related: human)	Pubmed	29491142	10.1074/jbc.M117.813741	2018
PHI:9135	1	1	1	unaffected pathogenicity	Fungal meningitis	Rodents	Mus musculus (related: house mouse)	Pubmed	29986893	10.1128/IAI.00069-18	2018
PHI:275	1	1	1	reduced virulence	Cryptococcosis	Rodents	Mus musculus (related: house mouse)	PubMed	14500501	10.1128/IAI.71.10.5794-5802.2003	2003
PHI:3997	1	1	1	unaffected pathogenicity		Rodents	Mus musculus (related: house mouse)	Pubmed	23670559	10.1128/IAI.00259-13	2013
PHI:4182	1	1	1	reduced virulence	Meningoencephalitis	Rodents	Mus musculus (related: house mouse)	Pubmed	24659785	10.1074/jbc.M113.537183	2014
PHI:8012	1	1	1	reduced virulence	Cryptococcosis	Rodents	Mus musculus (related: house mouse)	Pubmed	29581526	10.1038/s41598-018-21965-y	2018
PHI:6871	1	1	1	loss of pathogenicity	Fungal meningitis	Nematodes	Caenorhabditis elegans (related: roundworm)	Pubmed	28062578	10.1074/jbc.M116.767533	2017
PHI:2474	1	1	1	reduced virulence	Meningoencephalitis	Nematodes	Caenorhabditis elegans (related: roundworm)	Pubmed	23071437	10.1371/journal.ppat.1002957	2012
PHI:10323	1	1	1	unaffected pathogenicity	Fungal meningitis	Rodents	Mus musculus (related: house mouse)	Pubmed	32528953	10.3389/fcell.2020.00374	2020
PHI:241	1	1	1	loss of pathogenicity	Cryptococcosis	Rabbits & hares	Oryctolagus cuniculus (related: rabbit)	PubMed	12455973	10.1128/EC.1.1.75-84.2002	2002
PHI:4642	1	1	1	loss of pathogenicity	Cryptococcosis	Rodents	Mus musculus (related: house mouse)	Pubmed	25732100	10.1111/mmi.12985	2015
PHI:6555	1	1	1	unaffected pathogenicity	Invasive pulmonary aspergillosis	Rodents	Mus musculus (related: house mouse)	Pubmed	26787716	10.1128/IAI.01124-15	2016
PHI:7829	1	1	1	unaffected pathogenicity	Fungal meningitis	Rodents	Mus musculus (related: house mouse)	Pubmed	29346417	10.1371/journal.ppat.1006765	2018
PHI:7075	1	1	1	reduced virulence	Pleuropneumonia (pig)	Rodents	Mus musculus (related: house mouse)	Pubmed	28448619	10.1371/journal.pone.0176374	2017
PHI:9273	1	1	1	unaffected pathogenicity	Disseminated candidiasis	Rodents	Mus musculus (related: house mouse)	Pubmed	31138567	10.1128/AAC.00886-19	2019
PHI:8767	1	1	1	reduced virulence	Fungal meningitis	Rodents	Mus musculus (related: house mouse)	Pubmed	30602579	10.1128/mBio.01726-18	2019
PHI:7813	1	1	1	increased virulence (hypervirulence)	Fungal meningitis	Rodents	Mus musculus (related: house mouse)	Pubmed	29243387	10.1002/mbo3.564	2017
PHI:3098	1	1	1	reduced virulence	Cryptococcal meningoencephalitis	Rodents	Mus musculus (related: house mouse)	Pubmed	25011011	10.1016/j.fgb.2014.06.003	2014
PHI:3801	1	1	1	reduced virulence		Rodents	Mus musculus (related: house mouse)	Pubmed	23895559	10.1111/febs.12458	2013
PHI:10529	1	1	1	unaffected pathogenicity	Disseminated candidiasis	Rodents	Mus musculus (related: house mouse)	Pubmed	32075883	10.1128/mSphere.00062-20	2020
PHI:358	1	1	1	loss of pathogenicity	Cryptococcosis	Rodents	Mus musculus (related: house mouse)	PubMed	15133116	10.1099/mic.0.26928-0	2004
PHI:10048	1	1	1	reduced virulence	Salmonellosis	Rodents	Mus musculus (related: house mouse)	Pubmed	31826974	10.1128/mSphere.00796-19	2019
PHI:10399	1	1	1	loss of pathogenicity	Systemic cryptococcosis	Rodents	Mus musculus (related: house mouse)	Pubmed	32518190	10.1128/mBio.01127-20	2020
PHI:7763	1	1	1	increased virulence (hypervirulence)	Disseminated cryptococcosis	Rodents	Mus musculus (related: house mouse)	Pubmed	29203547	10.1128/IAI.00662-17	2017
PHI:14	1	1	1	loss of pathogenicity	Cryptococcosis	Rabbits & hares	Oryctolagus cuniculus (related: rabbit)	PubMed	12438649	10.1073/pnas.232568599	1993
PHI:10324	1	1	1	unaffected pathogenicity	Fungal meningitis	Rodents	Mus musculus (related: house mouse)	Pubmed	32528953	10.3389/fcell.2020.00374	2020
PHI:8794	1	1	1	reduced virulence	Cryptococcosis	Primates	Homo sapiens (related: human)	Pubmed	30755515	10.1128/mBio.02818-18	2019
PHI:2543	1	1	1	loss of pathogenicity	Invasive pulmonary aspergillosis	Rodents	Mus musculus (related: house mouse)	Pubmed	17352532	10.1371/journal.ppat.0030024	2007
PHI:242	1	1	1	reduced virulence	Candidiasis	Rodents	Mus musculus (related: house mouse)	PubMed	11895938	10.1128/IAI.70.4.1772-1782.2002	2002
PHI:9849	1	1	1	reduced virulence	Fungal meningitis	Rodents	Mus musculus (related: house mouse)	Pubmed	31744923	10.1128/mBio.02682-19	2019
PHI:10330	1	1	1	reduced virulence	Fungal meningitis	Rodents	Mus musculus (related: house mouse)	Pubmed	32528953	10.3389/fcell.2020.00374	2020
PHI:3017	1	1	1	reduced virulence		Rodents	Mus musculus (related: house mouse)	Pubmed	24895304	10.1128/mBio.01101-14	2014
PHI:8969	1	1	1	reduced virulence	Cryptococcosis	Rodents	Mus musculus (related: house mouse)	Pubmed	30789965	10.1371/journal.pone.0212651	2019
PHI:3903	1	1	1	reduced virulence	Invasive pulmonary aspergillosis	Rodents	Mus musculus (related: house mouse)	Pubmed	24244155	10.1371/journal.ppat.1003716	2013
PHI:7879	1	1	1	reduced virulence	Fungal meningitis	Rodents	Mus musculus (related: house mouse)	Pubmed	29425496	10.1016/j.celrep.2018.01.035	2018
PHI:259	1	1	1	reduced virulence	Candidiasis	Rodents	Mus musculus (related: house mouse)	PubMed	11994163	no data found	2002
PHI:10881	1	1	1	reduced virulence	Cryptococcosis	Rodents	Mus musculus (related: house mouse)	Pubmed	33158259	10.3390/microorganisms8111730	2020
PHI:280	1	1	1	reduced virulence	Cryptococcosis	Rodents	Mus musculus (related: house mouse)	PubMed	12654817	10.1128/IAI.71.4.1988-1994.2003	2003
PHI:3477	1	1	1	reduced virulence	Pneumococcal pneumonia	Rodents	Mus musculus (related: house mouse)	Pubmed	25538192	10.1128/mBio.01858-14	2014
PHI:387	1	1	1	loss of pathogenicity	Cryptococcosis	Rodents	Mus musculus (related: house mouse)	PubMed	15383535	10.1074/jbc.M408889200	2004
PHI:9543	1	1	1	reduced virulence	Candidiasis	Rodents	Mus musculus (related: house mouse)	Pubmed	31644792	10.1093/femsyr/foz075	2019
PHI:7016	1	1	1	reduced virulence	Nosocomial infection	Rodents	Mus musculus (related: house mouse)	Pubmed	27528506	10.1128/JB.00448-16	2016
PHI:4471	1	1	1	loss of pathogenicity	Invasive pulmonary aspergillosis	Rodents	Mus musculus (related: house mouse)	Pubmed	25597841	10.1111/mmi.12919	2015
PHI:7880	1	1	1	unaffected pathogenicity	Fungal meningitis	Rodents	Mus musculus (related: house mouse)	Pubmed	29425496	10.1016/j.celrep.2018.01.035	2018
PHI:10354	1	1	1	reduced virulence	Systemic cryptococcosis	Rodents	Mus musculus (related: house mouse)	Pubmed	32398313	10.1128/mBio.00711-20	2020
PHI:345	1	1	1	increased virulence (hypervirulence)	Cryptococcosis	Rodents	Mus musculus (related: house mouse)	PubMed	15302835	10.1128/EC.3.4.1028-1035.2004	2004
PHI:687	1	1	1	reduced virulence	Cryptococcosis	Rodents	Mus musculus (related: house mouse)	PubMed	1541525	no data found
PHI:7814	1	1	1	unaffected pathogenicity	Fungal meningitis	Rodents	Mus musculus (related: house mouse)	Pubmed	29243387	10.1002/mbo3.564	2017
PHI:7186	1	1	1	reduced virulence	Fungal meningitis	Rodents	Mus musculus (related: house mouse)	Pubmed	28559277	10.1074/jbc.M117.787994	2017
PHI:6076	1	1	1	reduced virulence	Disseminated candidiasis	Rodents	Mus musculus (related: house mouse)	Pubmed	26952720	10.1007/s00284-016-1019-7	2016
PHI:2513	1	1	1	loss of pathogenicity	Invasive pulmonary aspergillosis	Rodents	Mus musculus (related: house mouse)	Pubmed	17352532	10.1371/journal.ppat.0030024	2007
PHI:3489	1	1	1	loss of pathogenicity	Fungal meningitis	Rodents	Mus musculus (related: house mouse)	Pubmed	24747214	10.1128/EC.00054-14	2014
PHI:2504	1	1	1	unaffected pathogenicity	Invasive pulmonary aspergillosis	Rodents	Mus musculus (related: house mouse)	Pubmed	15746357	10.1128/AEM.71.3.1531-1538.2005	2005
PHI:497	1	1	1	reduced virulence	Cryptococcosis	Rodents	Mus musculus (related: house mouse)	PubMed	15728721	10.1091/mbc.E04-11-0987	2005
PHI:9226	1	1	1	increased virulence (hypervirulence)	Disseminated candidiasis	Rodents	Mus musculus (related: house mouse)	Pubmed	28967545	10.1016/j.ijmm.2017.09.017	2017
PHI:502	1	1	1	reduced virulence		Rodents	Mus musculus (related: house mouse)	PubMed	11606528	no data found
PHI:262	1	1	1	reduced virulence	Candidiasis	Rodents	Mus musculus (related: house mouse)	PubMed	12100546	no data found	2002
PHI:9846	1	1	1	reduced virulence	Fungal meningitis	Rodents	Mus musculus (related: house mouse)	Pubmed	31748248	10.1128/mSphere.00785-19	2019
PHI:9458	1	1	1	reduced virulence	Skin infection; food poisoning; respiratory disease	Rodents	Mus musculus (related: house mouse)	Pubmed	29056428	10.1016/j.chom.2017.09.004	2017
PHI:506	1	1	1	reduced virulence		Rodents	Mus musculus (related: house mouse)	PubMed	11606528	no data found
PHI:6074	1	1	1	reduced virulence	Disseminated candidiasis	Rodents	Mus musculus (related: house mouse)	Pubmed	26991697	10.1111/mmi.13376	2016
PHI:503	1	1	1	reduced virulence		Rodents	Mus musculus (related: house mouse)	PubMed	11606528	no data found
PHI:372	1	1	1	increased virulence (hypervirulence)	Cryptococcosis	Flies	Drosophila melanogaster (related: fruit fly)	PubMed	15075271	10.1128/EC.3.2.413-419.2004	2004
PHI:7216	1	1	1	reduced virulence	Salmonellosis	Rodents	Mus musculus (related: house mouse)	Pubmed	28575106	10.1371/journal.ppat.1006429	2017
PHI:5065	1	1	1	unaffected pathogenicity	Invasive pulmonary aspergillosis	Rodents	Mus musculus (related: house mouse)	Pubmed	26295576	10.1371/journal.pone.0135195	2015
PHI:8511	1	1	1	reduced virulence	Fungal meningitis	Rodents	Mus musculus (related: house mouse)	Pubmed	30291809	10.1111/cmi.12961	2018
PHI:3594	1	1	1	reduced virulence	Fungal meningitis	Rodents	Mus musculus (related: house mouse)	Pubmed	24728196	10.1128/EC.00069-14	2014
PHI:683	1	1	1	reduced virulence	Cryptococcosis	Rodents	Mus musculus (related: house mouse)	PubMed	16835458	10.1128/EC.00145-06	2006
PHI:220	1	1	1	reduced virulence	Cryptococcosis	Rabbits & hares	Oryctolagus cuniculus (related: rabbit)	PubMed	11359567	no data found	2001
PHI:2644	1	1	1	reduced virulence	Food poisoning	Nematodes	Caenorhabditis elegans (related: roundworm)	Pubmed	23028994	10.1371/journal.pone.0045417	2012
PHI:7073	1	1	1	lethal	Disseminated candidiasis	Rodents	Mus musculus (related: house mouse)	Pubmed	28337802	10.1111/mmi.13674	2017
PHI:6512	1	1	1	reduced virulence	Listeriosis	Rodents	Mus musculus (related: house mouse)	Pubmed	26015479	10.1128/IAI.00503-15	2015
PHI:9126	1	1	1	reduced virulence	Brucellosis	Rodents	Mus musculus (related: house mouse)	Pubmed	29632093	10.1128/JB.00105-18	2018
PHI:667	1	1	1	reduced virulence	Cryptococcosis	Rodents	Mus musculus (related: house mouse)	PubMed	14614821	no data found	2003
PHI:3354	1	1	1	reduced virulence	Vibriosis	Rodents	Mus musculus (related: house mouse)	Pubmed	24614656	10.1128/IAI.00017-14	2014
PHI:6447	1	1	1	reduced virulence	Pneumonia	Nematodes	Caenorhabditis elegans (related: roundworm)	Pubmed	25193085	10.1093/jac/dku340	2014
PHI:10196	1	1	1	increased virulence (hypervirulence)	Disseminated candidiasis	Rodents	Mus musculus (related: house mouse)	Pubmed	30870623	10.1016/j.chom.2019.02.008	2019
PHI:10405	1	1	1	reduced virulence	Invasive pulmonary aspergillosis	Rodents	Mus musculus (related: house mouse)	Pubmed	32326414	10.3390/genes11040423	2020
PHI:274	1	1	1	loss of pathogenicity	Cryptococcosis	Rodents	Mus musculus (related: house mouse)	PubMed	12139628	no data found	2002
PHI:4574	1	1	1	increased virulence (hypervirulence)	Fungal meningitis	Rodents	Mus musculus (related: house mouse)	Pubmed	25001408	10.1128/EC.00152-14	2014
PHI:7072	1	1	1	reduced virulence	Disseminated candidiasis	Rodents	Mus musculus (related: house mouse)	Pubmed	28337802	10.1111/mmi.13674	2017
PHI:3272	1	1	1	unaffected pathogenicity	Pneumonic plague	Rodents	Mus musculus (related: house mouse)	Pubmed	25220241	10.1016/j.micpath.2014.08.010	2014
PHI:7812	1	1	1	unaffected pathogenicity	Fungal meningitis	Rodents	Mus musculus (related: house mouse)	Pubmed	29243387	10.1002/mbo3.564	2017
PHI:11073	1	1	1	unaffected pathogenicity	Cryptococcal meningitis	Rodents	Mus musculus (related: house mouse)	Pubmed	31838381	10.1016/j.dnarep.2019.102751	2020
PHI:8905	1	1	1	reduced virulence	Disseminated candidiasis	Rodents	Mus musculus (related: house mouse)	Pubmed	29522815	10.1016/j.fgb.2018.03.001	2018
PHI:10653	1	1	1	reduced virulence	Disseminated candidiasis	Rodents	Mus musculus (related: house mouse)	Pubmed	32581079	10.1128/mSphere.00374-20	2020
PHI:197	1	1	1	reduced virulence	Candidiasis	Rodents	Mus musculus (related: house mouse)	PubMed	11349062	10.1128/IAI.69.6.3939-3946.2001	2001
PHI:4641	1	1	1	loss of pathogenicity	Cryptococcosis	Rodents	Mus musculus (related: house mouse)	Pubmed	25732100	10.1111/mmi.12985	2015
PHI:2961	1	1	1	reduced virulence	Enteric septicemia	Bony fishes	Ictalurus punctatus (related: channel catfish)	Pubmed	23762452	10.1371/journal.pone.0065973	2013
PHI:75	1	1	1	reduced virulence	Cryptococcosis	Nematodes	Caenorhabditis elegans (related: roundworm)	PubMed	12438649	10.1073/pnas.232568599	2002
PHI:4603	1	1	1	reduced virulence	Invasive pulmonary aspergillosis	Rodents	Mus musculus (related: house mouse)	Pubmed	25687931	10.1016/j.fgb.2015.02.006	2015
PHI:4103	1	1	1	reduced virulence	Periodontitis	Rodents	Mus musculus (related: house mouse)	Pubmed	24532232	10.1111/2049-632X.12156	2014
PHI:3455	1	1	1	reduced virulence	Cryptococcosis	Rodents	Mus musculus (related: house mouse)	Pubmed	24337112	10.1128/EC.00273-13	2013
PHI:10435	1	1	1	increased virulence (hypervirulence)	Cryptococcosis	Rodents	Mus musculus (related: house mouse)	Pubmed	32071275	10.1128/mBio.03373-19	2020
PHI:8897	1	1	1	reduced virulence	Disseminated candidiasis	Primates	Homo sapiens (related: human)	Pubmed	30792701	10.3389/fmicb.2019.00086	2019
PHI:4045	1	1	1	reduced virulence	Disseminated candidiasis	Rodents	Mus musculus (related: house mouse)	Pubmed	24496790	10.1128/mBio.00915-13	2014
PHI:672	1	1	1	increased virulence (hypervirulence)	Cryptococcosis	Rodents	Mus musculus (related: house mouse)	PubMed	11703667	no data found
PHI:10329	1	1	1	reduced virulence	Fungal meningitis	Rodents	Mus musculus (related: house mouse)	Pubmed	32528953	10.3389/fcell.2020.00374	2020
PHI:8808	1	1	1	increased virulence (hypervirulence)	Salmonellosis	Primates	Homo sapiens (related: human)	Pubmed	30648612	10.1016/j.resmic.2019.01.001	2019
PHI:11263	1	1	1	reduced virulence	Legionnaires' disease	Primates	Homo sapiens (related: human)	Pubmed	33491325	10.1111/cmi.13313	2021
PHI:129	1	1	1	reduced virulence	Cryptococcosis	Rodents	Mus musculus (related: house mouse)	PubMed	9573112	no data found	1998
PHI:7212	1	1	1	reduced virulence	Salmonellosis	Rodents	Mus musculus (related: house mouse)	Pubmed	28575106	10.1371/journal.ppat.1006429	2017
PHI:4640	1	1	1	loss of pathogenicity	Cryptococcosis	Rodents	Mus musculus (related: house mouse)	Pubmed	25732100	10.1111/mmi.12985	2015
PHI:11022	1	1	1	reduced virulence	Fungal meningitis	Rodents	Mus musculus (related: house mouse)	Pubmed	33082258	10.1128/mBio.01920-20	2020
PHI:10334	1	1	1	reduced virulence	Fungal meningitis	Rodents	Mus musculus (related: house mouse)	Pubmed	32528953	10.3389/fcell.2020.00374	2020
PHI:7654	1	1	1	reduced virulence	Invasive pulmonary aspergillosis	Rodents	Mus musculus (related: house mouse)	Pubmed	26605426	10.1080/21505594.2015.1109766	2015
PHI:6480	1	1	1	reduced virulence	Cryptococcosis	Rodents	Mus musculus (related: house mouse)	Pubmed	27353379	10.1016/j.bbrc.2016.06.123	2016
PHI:11247	1	1	1	unaffected pathogenicity	Nosocomial infection	Rodents	Mus musculus (related: house mouse)	Pubmed	33534802	10.1371/journal.pone.0244142	2021
PHI:7944	1	1	1	loss of pathogenicity	Fungal meningitis	Primates	Homo sapiens (related: human)	Pubmed	29382737	10.1128/mBio.02319-17	2018
PHI:10406	1	1	1	reduced virulence	Invasive pulmonary aspergillosis	Rodents	Mus musculus (related: house mouse)	Pubmed	32326414	10.3390/genes11040423	2020
PHI:384	1	1	1	loss of pathogenicity	Cryptococcosis	Rodents	Mus musculus (related: house mouse)	PubMed	15189996	10.1128/EC.3.3.752-763.2004	2004
PHI:235	1	1	1	reduced virulence	Cryptococcosis	Rodents	Mus musculus (related: house mouse)	PubMed	11737651	no data found	2001
PHI:3323	1	1	1	loss of pathogenicity	Invasive pulmonary aspergillosis	Rodents	Mus musculus (related: house mouse)	Pubmed	25196896	10.1111/mmi.12785	2014
PHI:9990	1	1	1	reduced virulence	Meningitis	Birds	Anas platyrhynchos (related: mallard)	Pubmed	31831050	10.1186/s13567-019-0725-0	2019
PHI:184	1	1	1	reduced virulence	Candidiasis	Rabbits & hares	Oryctolagus cuniculus (related: rabbit)	PubMed	10978273	no data found	2000
PHI:2651	1	1	1	unaffected pathogenicity	Food poisoning	Birds	Gallus gallus (related: chicken)	Pubmed	23284609	10.1371/journal.pone.0046675	2012
PHI:7208	1	1	1	unaffected pathogenicity	Fungal meningitis	Rodents	Mus musculus (related: house mouse)	Pubmed	28559486	10.1128/mBio.00595-17	2017
PHI:10352	1	1	1	reduced virulence	Systemic cryptococcosis	Rodents	Mus musculus (related: house mouse)	Pubmed	32398313	10.1128/mBio.00711-20	2020
PHI:8598	1	1	1	reduced virulence	Fungal meningitis	Rodents	Mus musculus (related: house mouse)	Pubmed	30459196	10.1128/mBio.02087-18	2018
PHI:10327	1	1	1	loss of pathogenicity	Fungal meningitis	Rodents	Mus musculus (related: house mouse)	Pubmed	32528953	10.3389/fcell.2020.00374	2020
PHI:505	1	1	1	reduced virulence		Rodents	Mus musculus (related: house mouse)	PubMed	11606528	no data found
PHI:8591	1	1	1	reduced virulence	Cryptococcosis	Rodents	Mus musculus (related: house mouse)	Pubmed	30483479	10.3389/fcimb.2018.00369	2018
PHI:7076	1	1	1	reduced virulence	Pleuropneumonia (pig)	Rodents	Mus musculus (related: house mouse)	Pubmed	28448619	10.1371/journal.pone.0176374	2017
PHI:265	1	1	1	loss of pathogenicity	Cryptococcosis	Rodents	Mus musculus (related: house mouse)	PubMed	12177356	10.1099/00221287-148-8-2617	2002
PHI:3102	1	1	1	reduced virulence	Toxoplasmic encephalitis	Rodents	Mus musculus (related: house mouse)	Pubmed	25032958	10.1371/journal.ppat.1004263	2014
PHI:10355	1	1	1	reduced virulence	Systemic cryptococcosis	Rodents	Mus musculus (related: house mouse)	Pubmed	32398313	10.1128/mBio.00711-20	2020
PHI:8867	1	1	1	unaffected pathogenicity	Disseminated candidiasis	Rodents	Mus musculus (related: house mouse)	Pubmed	30728284	10.1128/mSphere.00715-18	2019
PHI:370	1	1	1	reduced virulence	Cryptococcosis	Rodents	Mus musculus (related: house mouse)	PubMed	14871933	10.1128/EC.3.1.14-26.2004	2004
PHI:10565	1	1	1	reduced virulence	Infection	Bony fishes	Danio rerio (related: zebrafish)	Pubmed	32443590	10.3390/pathogens9050387	2020
PHI:11234	1	1	1	unaffected pathogenicity	Meningitis; septicemia; arthritis; pneumonia (pig)	Rodents	Mus musculus (related: house mouse)	Pubmed	33618766	10.1186/s13567-020-00887-6	2021
PHI:368	1	1	1	reduced virulence	Candidiasis	Rodents	Mus musculus (related: house mouse)	PubMed	14702416	10.1099/mic.0.26792-0	2004
PHI:9851	1	1	1	reduced virulence	Fungal meningitis	Rodents	Mus musculus (related: house mouse)	Pubmed	31744923	10.1128/mBio.02682-19	2019
PHI:9456	1	1	1	unaffected pathogenicity	Nematode trapping fungus	Nematodes	Caenorhabditis elegans (related: roundworm)	Pubmed	31481946	10.3389/fmicb.2019.01917	2019
PHI:96	1	1	1	loss of pathogenicity	Candidiasis	Rodents	Rattus (related: rat)	PubMed	8828218	10.1099/00221287-142-9-2509	1996
PHI:252	1	1	1	loss of pathogenicity	Candidiasis	Primates	Homo sapiens (related: human)	PubMed	12455696	10.1128/EC.1.5.787-798.2002	2002
PHI:218	1	1	1	reduced virulence	Cryptococcosis	Rabbits & hares	Oryctolagus cuniculus (related: rabbit)	PubMed	11157776	10.1101/gad.856001	2001
PHI:425	1	1	1	reduced virulence	Cryptococcosis	Rodents	Mus musculus (related: house mouse)	PubMed	15765146	10.1172/JCI200523048	2005
PHI:3321	1	1	1	loss of pathogenicity	Disseminated candidiasis	Rodents	Mus musculus (related: house mouse)	Pubmed	25220074	10.1016/j.fgb.2014.08.012	2014
PHI:10332	1	1	1	reduced virulence	Fungal meningitis	Rodents	Mus musculus (related: house mouse)	Pubmed	32528953	10.3389/fcell.2020.00374	2020
PHI:8789	1	1	1	reduced virulence	Fungal meningitis	Rodents	Mus musculus (related: house mouse)	Pubmed	30564211	10.3389/fmicb.2018.02958	2018
PHI:2833	1	1	1	loss of pathogenicity		Rodents	Mus musculus (related: house mouse)	Pubmed	17121456	10.1371/journal.pbio.0040410	2006
PHI:7028	1	1	1	reduced virulence	Urinary tract infection	Rodents	Mus musculus (related: house mouse)	Pubmed	27161114	10.1128/JB.00030-16	2016
PHI:4883	1	1	1	loss of pathogenicity	Fungal meningitis	Rodents	Mus musculus (related: house mouse)	Pubmed	26037119	10.1128/mBio.00531-15	2015
PHI:10299	1	1	1	unaffected pathogenicity	Gastric infections	Primates	Homo sapiens (related: human)	Pubmed	29660522	10.1016/j.micpath.2018.04.016	2018
PHI:6520	1	1	1	effector (plant avirulence determinant)	Legionnaires' disease	Rodents	Mus musculus (related: house mouse)	Pubmed	26216420	10.1128/IAI.00785-15	2015
PHI:7742	1	1	1	reduced virulence	Salmonellosis	Primates	Homo sapiens (related: human)	Pubmed	29150501	10.1128/AEM.01838-17	2017
PHI:4555	1	1	1	reduced virulence	Cryptococcosis	Rodents	Mus musculus (related: house mouse)	Pubmed	25675897	10.1111/febs.13229	2015
PHI:7301	1	1	1	reduced virulence	Opportunistic infection	Nematodes	Caenorhabditis elegans (related: roundworm)	Pubmed	28715477	10.1371/journal.ppat.1006504	2017
PHI:7344	1	1	1	reduced virulence	Skin infection; food poisoning; respiratory disease	Bony fishes	Danio rerio (related: zebrafish)	Pubmed	28808156	10.1128/IAI.00337-17	2017
PHI:10356	1	1	1	unaffected pathogenicity	Systemic cryptococcosis	Rodents	Mus musculus (related: house mouse)	Pubmed	32398313	10.1128/mBio.00711-20	2020
PHI:8587	1	1	1	reduced virulence	Nosocomial infection	Primates	Homo sapiens (related: human)	Pubmed	30235334	10.1371/journal.ppat.1007102	2018
PHI:8784	1	1	1	reduced virulence	Fungal meningitis	Rodents	Mus musculus (related: house mouse)	Pubmed	30630094	10.1016/j.fgb.2019.01.002	2019
PHI:7828	1	1	1	unaffected pathogenicity	Fungal meningitis	Rodents	Mus musculus (related: house mouse)	Pubmed	29346417	10.1371/journal.ppat.1006765	2018
PHI:3085	1	1	1	increased virulence (hypervirulence)	Periodontitis	Rodents	Rattus (related: rat)	Pubmed	25058444	10.1371/journal.pone.0102450	2014
PHI:3913	1	1	1	reduced virulence	Pneumonia; otitis media; septicemia; meningitis	Rodents	Mus musculus (related: house mouse)	Pubmed	24136784	10.1002/emmm.201202435	2013
PHI:6560	1	1	1	unaffected pathogenicity	Fungal meningitis	Rodents	Mus musculus (related: house mouse)	Pubmed	26385891	10.1128/EC.00100-15	2015
PHI:2841	1	1	1	unaffected pathogenicity		Rodents	Mus musculus (related: house mouse)	Pubmed	21453402	10.1111/j.1365-2958.2011.07632.x	2011
PHI:4557	1	1	1	unaffected pathogenicity	Cryptococcosis	Rodents	Mus musculus (related: house mouse)	Pubmed	25675897	10.1111/febs.13229	2015
PHI:6269	1	1	1	reduced virulence	Urinary tract infection	Rodents	Mus musculus (related: house mouse)	Pubmed	27073089	10.1128/mBio.00104-16	2016
PHI:9821	1	1	1	reduced virulence	Listeriosis	Primates	Homo sapiens (related: human)	Pubmed	29715536	10.1016/j.micpath.2018.04.059	2018
PHI:7762	1	1	1	reduced virulence	Disseminated cryptococcosis	Rodents	Mus musculus (related: house mouse)	Pubmed	29203547	10.1128/IAI.00662-17	2017
PHI:3515	1	1	1	unaffected pathogenicity	Meningoencephalitis	Rodents	Mus musculus (related: house mouse)	Pubmed	20673806	10.1016/j.fgb.2010.07.011	2011
PHI:7061	1	1	1	unaffected pathogenicity	Salmonellosis	Rodents	Mus musculus (related: house mouse)	Pubmed	27456828	10.1128/IAI.00337-16	2016
PHI:8793	1	1	1	reduced virulence	Cryptococcosis	Rodents	Mus musculus (related: house mouse)	Pubmed	30755515	10.1128/mBio.02818-18	2019
PHI:7178	1	1	1	reduced virulence	Cryptococcosis	Rodents	Mus musculus (related: house mouse)	Pubmed	28542452	10.1371/journal.pone.0177461	2017
PHI:474	1	1	1	loss of pathogenicity	Cryptococcosis	Rodents	Mus musculus (related: house mouse)	PubMed	11251806	no data found
PHI:4197	1	1	1	reduced virulence		Rodents	Mus musculus (related: house mouse)	Pubmed	24789368	10.1371/journal.ppat.1004037	2014
PHI:9919	1	1	1	reduced virulence	Tuberculosis	Primates	Homo sapiens (related: human)	Pubmed	32014406	10.1016/j.ijmm.2020.151402	2020
PHI:11028	1	1	1	unaffected pathogenicity	Invasive candidiasis	Primates	Homo sapiens (related: human)	Pubmed	33151931	10.1371/journal.pgen.1009071	2020
PHI:9058	1	1	1	reduced virulence	Fungal meningitis	Bony fishes	Danio rerio (related: zebrafish)	Pubmed	30921435	10.1371/journal.ppat.1007597	2019
PHI:10688	1	1	1	reduced virulence	Fungal meningitis	Rodents	Mus musculus (related: house mouse)	Pubmed	32900810	10.1128/mBio.02085-20	2020
PHI:10326	1	1	1	unaffected pathogenicity	Fungal meningitis	Rodents	Mus musculus (related: house mouse)	Pubmed	32528953	10.3389/fcell.2020.00374	2020
PHI:9848	1	1	1	reduced virulence	Fungal meningitis	Rodents	Mus musculus (related: house mouse)	Pubmed	31744923	10.1128/mBio.02682-19	2019
PHI:8019	1	1	1	reduced virulence	Sepsis	Rodents	Mus musculus (related: house mouse)	Pubmed	29554137	10.1371/journal.ppat.1006907	2018
PHI:10333	1	1	1	loss of pathogenicity	Fungal meningitis	Rodents	Mus musculus (related: house mouse)	Pubmed	32528953	10.3389/fcell.2020.00374	2020
PHI:8896	1	1	1	increased virulence (hypervirulence)	Disseminated candidiasis	Rodents	Mus musculus (related: house mouse)	Pubmed	30792701	10.3389/fmicb.2019.00086	2019
PHI:2842	1	1	1	unaffected pathogenicity		Rodents	Mus musculus (related: house mouse)	Pubmed	21453402	10.1111/j.1365-2958.2011.07632.x	2011
PHI:317	1	1	1	reduced virulence	Aspergillosis	Rodents	Mus musculus (related: house mouse)	PubMed	12704156	10.1128/IAI.71.5.2819-2826.2003	2003
PHI:600	1	1	1	unaffected pathogenicity	Cryptococcosis	Rabbits & hares	Oryctolagus cuniculus (related: rabbit)	PubMed	10899116	10.1093/emboj/19.14.3618	2000
PHI:450	1	1	1	reduced virulence	Cryptococcosis	Rodents	Mus musculus (related: house mouse)	PubMed	16041017	10.1128/IAI.73.8.5022-5030.2005	2005
PHI:3004	1	1	1	reduced virulence	Skin infection; food poisoning; respiratory disease	Rodents	Mus musculus (related: house mouse)	Pubmed	12791139	10.1046/j.1365-2958.2003.03524.x	2003
PHI:3825	1	1	1	reduced virulence		Rodents	Mus musculus (related: house mouse)	Pubmed	23998805	10.1111/mmi.12388	2013
PHI:9850	1	1	1	reduced virulence	Fungal meningitis	Rodents	Mus musculus (related: house mouse)	Pubmed	31744923	10.1128/mBio.02682-19	2019
PHI:2437	1	1	1	reduced virulence	Meningoencephalitis	Rodents	Mus musculus (related: house mouse)	Pubmed	20719250	10.1016/j.fgb.2010.08.002	2010
PHI:10331	1	1	1	reduced virulence	Fungal meningitis	Rodents	Mus musculus (related: house mouse)	Pubmed	32528953	10.3389/fcell.2020.00374	2020
PHI:9703	1	1	1	loss of pathogenicity	Disseminated candidiasis	Rodents	Mus musculus (related: house mouse)	Pubmed	31542189	10.1016/j.funbio.2019.06.002	2019
PHI:6146	1	1	1	reduced virulence	Pulmonary aspergillosis	Rodents	Mus musculus (related: house mouse)	Pubmed	26991818	10.1111/mmi.13377	2016
PHI:7211	1	1	1	reduced virulence	Salmonellosis	Rodents	Mus musculus (related: house mouse)	Pubmed	28575106	10.1371/journal.ppat.1006429	2017
PHI:11135	1	1	1	reduced virulence	Oropharyngeal candidiasis	Rodents	Mus musculus (related: house mouse)	Pubmed	33363697	10.1016/j.csbj.2020.11.034. eCollection 2020	2020
PHI:6850	1	1	1	unaffected pathogenicity	Gastric infections	Rodents	Mus musculus (related: house mouse)	Pubmed	27923069	10.1371/journal.ppat.1006018	2016
PHI:6749	1	1	1	loss of pathogenicity	Fungal meningitis	Rodents	Mus musculus (related: house mouse)	Pubmed	27496760	10.1093/glycob/cww078	2016
PHI:3332	1	1	1	loss of pathogenicity	Fungal meningitis	Rodents	Mus musculus (related: house mouse)	Pubmed	25267175	10.1016/j.fgb.2014.09.007	2014
PHI:378	1	1	1	reduced virulence	Candidiasis	Rodents	Mus musculus (related: house mouse)	PubMed	14731272	no data found	2004
PHI:10325	1	1	1	reduced virulence	Fungal meningitis	Rodents	Mus musculus (related: house mouse)	Pubmed	32528953	10.3389/fcell.2020.00374	2020
PHI:8875	1	1	1	loss of pathogenicity	Pulmonary aspergillosis	Rodents	Mus musculus (related: house mouse)	Pubmed	30698898	10.1111/cmi.13013	2019
PHI:89	1	1	1	loss of pathogenicity	Cryptococcosis	Rabbits & hares	Oryctolagus cuniculus (related: rabbit)	PubMed	9184205	10.1093/emboj/16.10.2576	1997
PHI:7964	1	1	1	reduced virulence	Urinary tract infection	Nematodes	Caenorhabditis elegans (related: roundworm)	Pubmed	29515100	10.1038/s41419-018-0423-2	2018
PHI:2321	1	1	1	reduced virulence	Aspergillosis	Rodents	Mus musculus (related: house mouse)	Pubmed	22106303	10.1073/pnas.1106399108	2011
PHI:6963	1	1	1	reduced virulence	Invasive pulmonary aspergillosis	Rodents	Mus musculus (related: house mouse)	Pubmed	28120495	10.1111/apm.12648	2017
PHI:424	1	1	1	reduced virulence	Cryptococcosis	Rodents	Mus musculus (related: house mouse)	PubMed	15765146	10.1172/JCI200523048	2005
PHI:10701	1	1	1	unaffected pathogenicity	Pneumonia	Primates	Homo sapiens (related: human)	Pubmed	32840575	10.1093/infdis/jiaa522	2020
PHI:2749	1	1	1	reduced virulence		Rodents	Mus musculus (related: house mouse)	Pubmed	23322637	10.1128/mBio.00522-12	2013
PHI:232	1	1	1	reduced virulence	Cryptococcosis	Rodents	Mus musculus (related: house mouse)	PubMed	11248066	10.1073/pnas.061031998	2001
PHI:8556	1	1	1	increased virulence (hypervirulence)	Nosocomial infection	Rodents	Mus musculus (related: house mouse)	Pubmed	30294316	10.3389/fmicb.2018.02244	2018
PHI:2530	1	1	1	loss of pathogenicity	Invasive pulmonary aspergillosis	Rodents	Mus musculus (related: house mouse)	Pubmed	17352532	10.1371/journal.ppat.0030024	2007
PHI:2293	1	1	1	reduced virulence	Aspergillosis	Rodents	Mus musculus (related: house mouse)	Pubmed	22443190	10.1111/j.1365-2958.2012.08034.x	2012
PHI:489	1	1	1	reduced virulence	Cryptococcosis	Rodents	Mus musculus (related: house mouse)	PubMed	16045626	10.1111/j.1365-2958.2005.04735.x	2005
PHI:360	1	1	1	reduced virulence	Cryptococcosis	Nematodes	Caenorhabditis elegans (related: roundworm)	PubMed	15469513	10.1111/j.1365-2958.2004.04310.x	2004
PHI:386	1	1	1	reduced virulence	Cryptococcosis	Rodents	Mus musculus (related: house mouse)	PubMed	14982637	10.1111/j.1365-2958.2004.03921.x	2004
PHI:9961	1	1	1	reduced virulence	Cryptococcal meningitis	Rodents	Mus musculus (related: house mouse)	Pubmed	31932719	10.1038/s41589-019-0437-9	2020
PHI:4626	1	1	0	unaffected pathogenicity	Disseminated candidiasis	Rodents	Mus musculus (related: house mouse)	Pubmed	25772226	10.1111/febs.13264	2015
PHI:6241	1	1	0	reduced virulence	Fungal meningitis	Rodents	Mus musculus (related: house mouse)	Pubmed	27118799	10.1093/mmy/myw013	2016
PHI:9843	1	1	0	unaffected pathogenicity	Infection	Flies	Drosophila melanogaster (related: fruit fly)	Pubmed	30224439	10.1128/JB.00380-18	2018
PHI:7860	1	1	0	reduced virulence	Nosocomial infection	Nematodes	Caenorhabditis elegans (related: roundworm)	Pubmed	28507065	10.1128/IAI.00327-17	2017
PHI:9962	1	1	0	reduced virulence	Cryptococcal meningitis	Rodents	Mus musculus (related: house mouse)	Pubmed	31932719	10.1038/s41589-019-0437-9	2020
PHI:8687	1	1	0	unaffected pathogenicity	Fungal meningitis	Rodents	Mus musculus (related: house mouse)	Pubmed	30425151	10.1128/mBio.02135-18	2018
PHI:282	1	0	1	reduced virulence	Candidiasis	Rodents	Mus musculus (related: house mouse)	PubMed	12819094	10.1128/IAI.71.7.4045-4051.2003	2003
PHI:7933	1	0	1	reduced virulence	Disseminated candidiasis	Primates	Homo sapiens (related: human)	Pubmed	29491142	10.1074/jbc.M117.813741	2018
PHI:10644	1	0	1	unaffected pathogenicity	Disseminated candidiasis	Rodents	Mus musculus (related: house mouse)	Pubmed	32612591	10.3389/fmicb.2020.01274	2020
PHI:8971	1	0	1	unaffected pathogenicity	Disseminated candidiasis	Rodents	Mus musculus (related: house mouse)	Pubmed	30858840	10.3389/fmicb.2019.00327	2019
PHI:476	1	0	1	reduced virulence	Cryptococcosis	Rodents	Mus musculus (related: house mouse)	PubMed	11298287	no data found
PHI:676	1	0	1	reduced virulence	Cryptococcosis	Rodents	Mus musculus (related: house mouse)	PubMed	12455960	10.1128/EC.1.2.257-272.2002	2002
PHI:9699	1	0	1	reduced virulence	Tularemia	Rodents	Mus musculus (related: house mouse)	Pubmed	31648246	10.1371/journal.pone.0224094	2019
PHI:6991	1	0	0	loss of pathogenicity	Opportunistic infection	Rodents	Mus musculus (related: house mouse)	Pubmed	28246361	10.1128/mBio.00140-17	2017
PHI:253	1	0	0	reduced virulence	Aspergillosis	Rodents	Mus musculus (related: house mouse)	PubMed	12146755	10.1080/mmy.40.3.259.262	2002
PHI:10038	1	0	0	unaffected pathogenicity	Cholera	Rodents	Mus musculus (related: house mouse)	Pubmed	32059031	10.1371/journal.ppat.1008313	2020
PHI:5307	0	1	1	unaffected pathogenicity	Nosocomial bacteremia	Rodents	Mus musculus (related: house mouse)	Pubmed	26611826	10.1016/j.meegid.2015.11.020	2015
PHI:4038	0	1	0	reduced virulence	Skin infection; food poisoning; respiratory disease	Rodents	Mus musculus (related: house mouse)	Pubmed	24302255	10.1128/mBio.00976-13	2013
PHI:5572	0	1	0	unaffected pathogenicity	Salmonellosis	Rodents	Mus musculus (related: house mouse)	Pubmed	26810370	10.1093/infdis/jiw028	2016
PHI:6752	0	1	0	unaffected pathogenicity	Invasive pulmonary aspergillosis	Rodents	Mus musculus (related: house mouse)	Pubmed	27649508	10.1371/journal.ppat.1005899	2016
PHI:9544	0	1	0	increased virulence (hypervirulence)	Candidiasis	Rodents	Mus musculus (related: house mouse)	Pubmed	31644792	10.1093/femsyr/foz075	2019
PHI:9225	0	1	0	increased virulence (hypervirulence)	Disseminated candidiasis	Rodents	Mus musculus (related: house mouse)	Pubmed	28967545	10.1016/j.ijmm.2017.09.017	2017
PHI:678	0	1	0	lethal	Cryptococcosis	Rodents	Mus musculus (related: house mouse)	PubMed	12455960	10.1128/EC.1.2.257-272.2002	2002
PHI:281	0	1	0	reduced virulence	Candidiasis	Rodents	Mus musculus (related: house mouse)	PubMed	12819094	10.1128/IAI.71.7.4045-4051.2003	2003
PHI:6600	0	1	0	reduced virulence	Bacteremia	Bony fishes	Danio rerio (related: zebrafish)	Pubmed	27506797	10.1073/pnas.1523116113	2016
PHI:292	0	1	0	reduced virulence	Cryptococcosis	Rodents	Mus musculus (related: house mouse)	PubMed	12933837	10.1128/IAI.71.9.4953-4960.2003	2003
PHI:4208	0	1	0	reduced virulence	Disseminated candidiasis	Rodents	Mus musculus (related: house mouse)	Pubmed	24732310	10.1371/journal.pone.0094468	2014
PHI:6870	0	1	0	reduced virulence	Luminous vibriosis	Bony fishes	Danio rerio (related: zebrafish)	Pubmed	27966258	10.1111/jam.13342	2017
PHI:3238	0	1	0	unaffected pathogenicity	Pulmonary aspergillosis	Rodents	Mus musculus (related: house mouse)	Pubmed	25281782	10.1016/j.fgb.2014.09.008	2014
PHI:10328	0	1	0	reduced virulence	Fungal meningitis	Rodents	Mus musculus (related: house mouse)	Pubmed	32528953	10.3389/fcell.2020.00374	2020
PHI:6720	0	1	0	reduced virulence	Streptococcal toxic shock syndrome	Rodents	Mus musculus (related: house mouse)	Pubmed	27524648	10.1016/j.micres.2016.05.007	2016
PHI:7930	0	1	0	reduced virulence	Disseminated candidiasis	Primates	Homo sapiens (related: human)	Pubmed	29491142	10.1074/jbc.M117.813741	2018
PHI:8494	0	0	1	increased virulence (hypervirulence)	Invasive pulmonary aspergillosis	Primates	Homo sapiens (related: human)	Pubmed	30286953	10.1016/j.bbrc.2018.09.157	2018
PHI:2358	0	0	1	reduced virulence	Invasive pulmonary aspergillosis	Rodents	Mus musculus (related: house mouse)	Pubmed	22083709	10.1128/IAI.05830-11	2011
PHI:9189	0	0	1	unaffected pathogenicity	Infectious bronchitis	Rodents	Rattus rattus (related: black rat)	Pubmed	31019000	10.1128/mSphere.00093-19	2019
Note: Retain the "Birds","Bony fishes","Flies","Nematodes","Primates","Rabbits & hares","Rodents" from the host description.
