# Supplementary material for: Complete Genome Sequencing and Comparative Analysis of the Clinically-Derived Apiotrichum mycotoxinivorans Strain GMU1709
Source: Frontiers journal article supplement (doi:10.3389/fcimb.2022.834015), 2022-02-04
Supplement: Table_4.xls [file Table_4.xls]

## Sheet: Significant difference of PHI
Accession	Total PHI Number	A. mycotoxinovorans CICC 1454	A. mycotoxinovorans GMU1709	T. cutaneum ACCC 20271	A. brassicae JCM 1599	A. domesticum JCM 9580	A. gamsii JCM 9941	A. gracile JCM 10018	A. laibachii JCM 2947	A. montevideense JCM 9937	A. porosum DSM 27194	A. porosum JCM 1458	A. veenhuisii JCM 10691	C. arboriformis JCM 14201	C. oleaginosum ATCC 20509	C. curvatum SBUG-Y 855	C. cutaneum B3	C. cutaneum JCM 1462	C. cyanovorans JCM 31833	C. daszewskae JCM 11166	C. dermatis JCM 11170	C. mucoides JCM 9939	C. oleaginosum ATCC 20508	C. oleaginosum IBC0246	T. akiyoshidainum HP2023	T. asahii CBS 2479	T. asahii CBS 8904	T. asahii JCM 2466	T. asahii N5 275 008G1	T. coremiiforme JCM 2938	T. faecale JCM 2941	T. inkin ATCC 18020	T. inkin JCM 9195	T. ovoides JCM 9940	V. humicola CBS 4282	V. humicola JCM 1457	V. humicola UJ1	Pvalue	Mutant Phenotype	Disease	Host description	Host species	Ref. Source	PMID	DOI	Year
PHI:6784	3	1	1	1	0	0	0	0	0	0	0	0	0	0	0	0	0	0	0	0	0	0	0	0	0	0	0	0	0	0	0	0	0	0	0	0	0	4.73232e-09	reduced virulence	Oral candidiasis	Primates	Homo sapiens (related: human)	Pubmed	10540295	10.1046/j.1365-2958.1999.01590.x	1999
PHI:6096	3	1	1	1	0	0	0	0	0	0	0	0	0	0	0	0	0	0	0	0	0	0	0	0	0	0	0	0	0	0	0	0	0	0	0	0	0	4.73232e-09	increased virulence (hypervirulence)	Pneumococcal pneumonia	Rodents	Mus musculus (related: house mouse)	Pubmed	26973817	10.3389/fcimb.2016.00023	2016
PHI:72	3	1	1	1	0	0	0	0	0	0	0	0	0	0	0	0	0	0	0	0	0	0	0	0	0	0	0	0	0	0	0	0	0	0	0	0	0	4.73232e-09	reduced virulence	Candidiasis	Rodents	Cavia porcellus (related: domestic guinea pig)	PubMed	9284116	no data found	1997
PHI:6790	3	1	1	1	0	0	0	0	0	0	0	0	0	0	0	0	0	0	0	0	0	0	0	0	0	0	0	0	0	0	0	0	0	0	0	0	0	4.73232e-09	loss of pathogenicity	Vaginal candidiasis	Rodents	Rattus rattus (related: black rat)	Pubmed	9841840	10.1086/314546	1999
PHI:6812	3	1	1	1	0	0	0	0	0	0	0	0	0	0	0	0	0	0	0	0	0	0	0	0	0	0	0	0	0	0	0	0	0	0	0	0	0	4.73232e-09	unaffected pathogenicity	Peritonitis	Rodents	Mus musculus (related: house mouse)	Pubmed	10569785	no data found	1999
PHI:7925	4	1	1	1	0	0	0	0	0	0	0	0	1	0	0	0	0	0	0	0	0	0	0	0	0	0	0	0	0	0	0	0	0	0	0	0	0	5.95425e-07	reduced virulence	Disseminated candidiasis	Primates	Homo sapiens (related: human)	Pubmed	29491142	10.1074/jbc.M117.813741	2018
PHI:4626	2	1	1	0	0	0	0	0	0	0	0	0	0	0	0	0	0	0	0	0	0	0	0	0	0	0	0	0	0	0	0	0	0	0	0	0	0	2.77526e-06	unaffected pathogenicity	Disseminated candidiasis	Rodents	Mus musculus (related: house mouse)	Pubmed	25772226	10.1111/febs.13264	2015
PHI:9332	5	1	1	1	0	0	0	0	0	0	1	1	0	0	0	0	0	0	0	0	0	0	0	0	0	0	0	0	0	0	0	0	0	0	0	0	0	1.11396e-05	reduced virulence	Colitis	Rodents	Mus musculus (related: house mouse)	Pubmed	31251784	10.1371/journal.ppat.1007898	2019
PHI:7863	5	1	1	1	0	0	0	0	0	0	0	0	0	0	0	0	0	1	0	0	0	0	0	0	0	1	0	0	0	0	0	0	0	0	0	0	0	1.11396e-05	reduced virulence	Mycosis	Rodents	Mus musculus (related: house mouse)	Pubmed	29358719	10.1038/s41598-018-19453-4	2018
PHI:9402	5	1	1	1	0	1	0	0	0	1	0	0	0	0	0	0	0	0	0	0	0	0	0	0	0	0	0	0	0	0	0	0	0	0	0	0	0	1.11396e-05	reduced virulence	Mycosis	Primates	Homo sapiens (related: human)	Pubmed	31434748	10.1128/mSphere.00484-19	2019
PHI:313	5	1	1	1	0	0	0	0	0	0	0	0	0	0	0	0	0	0	0	0	0	0	0	0	0	0	0	0	0	1	0	0	1	0	0	0	0	1.11396e-05	reduced virulence	Cryptococcosis	Rodents	Mus musculus (related: house mouse)	PubMed	12787363	10.1046/j.1365-2958.2003.03508.x	2003
PHI:4957	34	0	0	0	1	1	1	1	1	1	1	1	0	1	1	1	1	1	1	1	1	1	1	1	1	1	1	1	1	2	1	1	1	2	1	1	1	2.73229e-05	increased virulence (hypervirulence)	Tuberculosis	Rodents	Mus musculus (related: house mouse)	Pubmed	25267836	10.1128/IAI.02304-14	2014
PHI:6617	34	0	0	0	1	1	1	1	1	1	1	1	0	1	1	1	1	1	1	1	1	1	1	1	1	1	1	1	1	2	1	1	1	2	1	1	1	2.73229e-05	increased virulence (hypervirulence)	Tuberculosis	Bony fishes	Danio rerio (related: zebrafish)	Pubmed	27621726	10.3389/fmicb.2016.01347	2016
PHI:10913	6	1	1	1	1	0	0	1	0	0	0	0	1	0	0	0	0	0	0	0	0	0	0	0	0	0	0	0	0	0	0	0	0	0	0	0	0	8.00327e-05	reduced virulence	Septic shock	Primates	Homo sapiens (related: human)	Pubmed	33082376	10.1038/s41598-020-74692-8	2020
PHI:5578	7	1	1	1	0	0	0	1	1	0	0	0	2	0	0	0	0	0	0	0	0	0	0	0	0	0	0	0	0	0	0	0	0	0	0	0	0	0.000143211	reduced virulence	Tuberculosis	Rodents	Mus musculus (related: house mouse)	Pubmed	26751071	10.1371/journal.ppat.1005351	2016
PHI:125	7	1	1	1	0	1	0	0	0	1	0	0	2	0	0	0	0	0	0	0	0	0	0	0	0	0	0	0	0	0	0	0	0	0	0	0	0	0.000143211	reduced virulence	Candidiasis	Rodents	Mus musculus (related: house mouse)	PubMed	9284117	no data found	1997
PHI:4155	7	1	1	1	0	1	0	0	1	0	0	0	0	0	0	0	0	0	0	1	0	0	0	0	1	0	0	0	0	0	0	0	0	0	0	0	0	0.000332018	reduced virulence	Meningitis	Rodents	Mus musculus (related: house mouse)	Pubmed	24637959	10.1371/journal.pone.0091971	2014
PHI:8151	7	1	1	1	0	1	0	0	1	0	0	0	0	0	0	0	0	0	0	1	0	0	0	0	1	0	0	0	0	0	0	0	0	0	0	0	0	0.000332018	reduced virulence	Meningitis	Rodents	Mus musculus (related: house mouse)	Pubmed	29797543	10.1111/cmi.12862	2018
PHI:8768	43	2	2	2	1	1	1	1	1	1	1	1	2	1	1	1	1	1	1	1	1	1	1	1	1	1	1	1	1	1	1	2	1	2	2	1	1	0.000332018	reduced virulence	Fungal meningitis	Rodents	Mus musculus (related: house mouse)	Pubmed	30602579	10.1128/mBio.01726-18	2019
PHI:10536	12	2	1	2	0	0	0	0	0	0	0	0	0	0	0	0	0	0	0	0	0	0	0	0	1	1	1	1	1	2	0	0	0	0	0	0	0	0.000769017	reduced virulence	Infection	Rodents	Mus musculus (related: house mouse)	Pubmed	32409599	10.1073/pnas.1919683117	2020
PHI:3277	8	1	1	1	0	0	0	0	1	0	1	1	1	0	0	0	0	0	0	0	0	0	0	0	1	0	0	0	0	0	0	0	0	0	0	0	0	0.000975874	unaffected pathogenicity	Invasive pulmonary aspergillosis	Rodents	Mus musculus (related: house mouse)	Pubmed	25309516	10.3389/fmicb.2014.00469	2014
PHI:4038	1	0	1	0	0	0	0	0	0	0	0	0	0	0	0	0	0	0	0	0	0	0	0	0	0	0	0	0	0	0	0	0	0	0	0	0	0	0.00129936	reduced virulence	Skin infection; food poisoning; respiratory disease	Rodents	Mus musculus (related: house mouse)	Pubmed	24302255	10.1128/mBio.00976-13	2013
PHI:282	4	1	0	1	0	0	0	0	1	0	0	0	0	0	0	0	0	0	0	0	0	0	0	0	1	0	0	0	0	0	0	0	0	0	0	0	0	0.00193047	reduced virulence	Candidiasis	Rodents	Mus musculus (related: house mouse)	PubMed	12819094	10.1128/IAI.71.7.4045-4051.2003	2003
PHI:9264	9	1	1	1	0	1	0	1	0	1	0	0	0	1	0	0	0	0	1	0	0	0	0	0	0	0	0	0	0	0	0	0	0	1	0	0	0	0.00227755	unaffected pathogenicity	Nosocomial infection	Rodents	Mus musculus (related: house mouse)	Pubmed	31157175	10.3389/fcimb.2019.00160	2019
PHI:8693	32	2	2	2	1	1	2	1	1	1	1	1	1	1	1	1	0	1	1	0	0	0	1	1	1	1	1	1	1	2	1	0	0	1	0	0	0	0.00242942	loss of pathogenicity	Disseminated candidiasis	Rodents	Mus musculus (related: house mouse)	Pubmed	30476034	10.1093/femsyr/foy124	2018
PHI:5267	30	3	2	2	1	1	1	1	1	1	1	1	1	0	0	0	0	0	0	0	0	0	0	0	1	1	1	1	1	2	1	0	1	2	1	1	1	0.00288731	increased virulence (hypervirulence)	Invasive pulmonary aspergillosis	Rodents	Mus musculus (related: house mouse)	Pubmed	26492565	10.1371/journal.ppat.1005187	2015
PHI:3453	44	2	2	2	1	1	1	1	1	1	2	2	1	1	1	0	2	1	1	1	1	2	1	1	1	1	1	1	1	2	1	1	1	2	1	1	1	0.00332578	reduced virulence	Cryptococcosis	Rodents	Mus musculus (related: house mouse)	Pubmed	25477510	10.1074/jbc.M114.607705	2014
PHI:10335	69	1	1	1	1	2	2	1	2	2	2	2	2	2	2	0	3	2	2	2	2	3	2	2	2	2	2	2	2	3	2	1	2	4	2	2	2	0.00346669	loss of pathogenicity	Fungal meningitis	Rodents	Mus musculus (related: house mouse)	Pubmed	32528953	10.3389/fcell.2020.00374	2020
PHI:6476	46	2	2	2	2	1	1	2	2	1	1	1	1	1	1	1	1	1	1	1	1	2	1	1	1	1	1	1	1	2	1	1	2	2	1	1	1	0.00452041	reduced virulence	Pulmonary aspergillosis	Rodents	Mus musculus (related: house mouse)	Pubmed	27446037	10.3389/fmicb.2016.00997	2016
PHI:5059	55	3	3	3	2	1	1	3	2	1	2	2	3	2	1	0	2	1	0	1	1	2	1	1	1	1	1	1	1	2	1	0	1	2	2	2	2	0.00482412	unaffected pathogenicity	Infection	Rodents	Mus musculus (related: house mouse)	Pubmed	26313907	10.1371/journal.ppat.1005129	2015
PHI:9230	80	4	3	4	1	2	3	2	2	2	3	3	4	2	2	1	2	2	2	2	1	2	2	2	2	1	2	2	2	4	2	1	2	3	2	2	2	0.00491218	unaffected pathogenicity	Avian colisepticemia	Rodents	Mus musculus (related: house mouse)	Pubmed	31046828	10.1186/s13567-019-0650-2	2019
PHI:420	28	2	2	2	1	1	1	0	1	1	1	1	2	1	1	1	2	1	1	0	1	2	1	1	1	0	0	0	0	0	0	0	0	0	0	0	0	0.00571726	loss of pathogenicity	Meningoencephalitis	Rodents	Mus musculus (related: house mouse)	PubMed	15752200	10.1111/j.1365-2958.2005.04503.x	2005
PHI:2810	67	1	1	1	2	2	3	2	2	2	2	2	1	1	2	2	2	3	2	1	1	3	2	2	2	2	2	2	2	3	2	1	1	2	2	2	2	0.00708218	reduced virulence	Pulmonary cryptococcosis; basal meningitis; cerebral cryptococcomas	Rodents	Mus musculus (related: house mouse)	Pubmed	21249145	10.1371/journal.pone.0016076	2011
PHI:7520	218	10	10	10	6	6	6	4	5	6	6	7	6	4	5	4	9	5	6	4	6	9	5	5	7	4	5	5	5	5	5	7	8	11	4	4	4	0.00708542	unaffected pathogenicity	Pneumonia	Rodents	Mus musculus (related: house mouse)	Pubmed	28861522	10.1128/mSphere.00341-17	2017
PHI:9203	40	0	0	0	1	1	2	1	1	1	1	1	1	2	2	1	2	2	1	1	2	2	2	2	1	1	1	0	1	2	1	1	1	2	0	0	0	0.00723735	unaffected pathogenicity	Pulmonary aspergillosis	Rodents	Mus musculus (related: house mouse)	Pubmed	31100153	10.1093/mmy/myz043	2019
PHI:9496	11	1	1	1	0	1	1	0	0	0	1	0	0	0	0	1	0	0	1	0	0	0	0	0	0	0	0	0	0	0	0	0	0	0	1	1	1	0.00797156	reduced virulence	Infection	Rodents	Mus musculus (related: house mouse)	Pubmed	31487966	10.3390/ijms20184339	2019
PHI:6795	32	0	0	0	1	2	1	0	1	2	1	1	0	1	1	0	2	1	0	0	1	2	1	1	1	1	1	1	1	2	1	1	1	1	1	0	1	0.00837615	reduced virulence	Disseminated candidiasis	Rodents	Mus musculus (related: house mouse)	Pubmed	27815149	10.1016/j.fgb.2016.10.007	2016
PHI:9276	12	1	1	1	0	0	0	0	0	0	0	0	0	0	1	0	2	1	0	0	1	2	1	1	0	0	0	0	0	0	0	0	0	0	0	0	0	0.00943114	unaffected pathogenicity	Invasive pulmonary aspergillosis	Rodents	Mus musculus (related: house mouse)	Pubmed	31131706	10.1080/21505594.2019.1620063	2019
PHI:8898	12	1	1	1	0	0	0	0	0	0	0	0	0	0	0	0	0	0	0	0	0	0	0	0	0	1	1	1	1	2	1	0	1	1	0	0	0	0.0113517	reduced virulence	Plague	Rodents	Mus musculus (related: house mouse)	Pubmed	29610260	10.1128/IAI.00224-18	2019
PHI:7938	12	1	1	1	0	0	1	1	0	0	1	1	0	0	0	0	0	0	0	1	0	0	0	0	0	0	0	0	0	0	0	1	0	0	1	1	1	0.0128612	reduced virulence	Periodontitis	Rodents	Mus musculus (related: house mouse)	Pubmed	29488863	10.1099/mic.0.000640	2018
PHI:6822	12	1	1	1	0	0	0	1	0	0	0	0	1	0	1	0	0	0	0	0	1	1	1	1	0	0	0	0	0	0	0	0	0	0	1	0	1	0.0128612	reduced virulence	Disseminated candidiasis	Nematodes	Caenorhabditis elegans (related: roundworm)	Pubmed	27932543	10.1534/genetics.116.195024	2016
PHI:7350	28	0	0	0	0	0	1	1	1	0	1	1	2	1	1	1	1	1	0	1	1	1	1	1	1	1	1	1	1	2	1	0	1	2	0	0	0	0.0140316	unaffected pathogenicity	Skin infection; food poisoning; respiratory disease	Bony fishes	Danio rerio (related: zebrafish)	Pubmed	28808156	10.1128/IAI.00337-17	2017
PHI:7511	98	4	4	4	3	3	2	2	3	3	4	4	3	2	2	2	5	3	2	2	2	5	2	2	3	2	2	2	2	3	2	2	2	4	2	2	2	0.0145518	unaffected pathogenicity	Pneumonia	Rodents	Mus musculus (related: house mouse)	Pubmed	28861522	10.1128/mSphere.00341-17	2017
PHI:3416	91	4	5	4	3	2	1	3	2	2	2	2	3	4	1	2	5	5	3	2	3	5	1	1	3	2	2	2	2	3	1	1	1	3	2	2	2	0.0157511	reduced virulence	Fungal meningitis	Rodents	Mus musculus (related: house mouse)	Pubmed	24478097	10.1128/IAI.01357-13	2014
PHI:7009	66	1	1	1	1	2	2	2	2	2	2	2	1	1	2	3	2	2	2	2	2	3	2	2	1	1	2	1	2	3	2	1	1	4	2	2	2	0.0160073	reduced virulence	Disseminated candidiasis	Rodents	Mus musculus (related: house mouse)	Pubmed	28192532	10.1371/journal.ppat.1006205	2017
PHI:7047	46	2	2	2	1	1	2	1	2	1	1	2	1	1	1	1	2	1	1	1	1	1	1	1	1	1	2	1	2	2	1	0	0	3	1	1	1	0.0164986	unaffected pathogenicity	Fungal meningitis	Rodents	Mus musculus (related: house mouse)	Pubmed	28251810	10.1111/1758-2229.12527	2017
PHI:8716	29	2	2	2	2	1	0	2	1	1	0	0	2	0	1	0	0	1	0	1	0	0	1	1	2	0	0	2	2	0	0	2	0	1	0	0	0	0.0173807	loss of pathogenicity	Disseminated candidiasis	Rodents	Mus musculus (related: house mouse)	Pubmed	30507002	10.1111/mmi.14176	2018
PHI:511	214	8	10	8	3	8	7	6	9	8	7	8	6	3	7	5	7	6	5	4	5	8	7	7	9	4	4	4	4	6	4	3	3	6	5	5	5	0.0176467	reduced virulence	Candidiasis	Rodents	Mus musculus (related: house mouse)	PubMed	12076781	10.1111/j.1574-6968.2002.tb11238.x	2002
PHI:7305	13	1	1	1	1	1	0	0	0	1	1	1	1	0	0	0	0	0	0	0	0	0	0	0	0	0	0	0	0	0	0	1	1	2	0	0	0	0.0179108	reduced virulence	Opportunistic infection	Nematodes	Caenorhabditis elegans (related: roundworm)	Pubmed	28715477	10.1371/journal.ppat.1006504	2017
PHI:5344	13	1	1	1	1	0	1	1	1	0	1	1	1	0	1	0	0	0	0	0	0	0	0	1	0	0	0	0	0	0	0	1	0	0	0	0	0	0.0193746	reduced virulence	Melioidosis	Rodents	Mus musculus (related: house mouse)	Pubmed	26583079	10.3389/fcimb.2015.00078	2015
PHI:62	13	1	1	1	0	0	1	0	1	1	1	1	1	1	1	0	0	1	0	0	0	0	1	0	0	0	0	0	0	0	0	0	0	0	0	0	0	0.0193746	reduced virulence	Candidiasis	Rodents	Mus musculus (related: house mouse)	PubMed	9308185	10.1099/00221287-143-9-3033	1997
PHI:6438	28	0	0	0	0	0	1	0	0	0	1	1	0	1	1	1	2	1	1	1	1	2	1	1	0	1	1	1	1	2	1	0	1	2	1	0	1	0.0223131	increased virulence (hypervirulence)	Nosocomial infection	Rodents	Mus musculus (related: house mouse)	Pubmed	27345215	10.1038/srep28684	2016
PHI:7258	30	2	2	2	0	0	0	1	1	0	0	0	0	1	1	0	3	1	1	1	2	3	1	1	1	0	0	0	0	0	0	0	0	0	2	2	2	0.0228962	reduced virulence	Listeriosis	Rodents	Mus musculus (related: house mouse)	Pubmed	28702378	10.3389/fcimb.2017.00287	2017
PHI:8901	104	5	4	5	2	2	3	2	2	1	4	3	3	3	2	1	6	2	1	2	3	6	2	2	2	3	3	3	3	5	3	2	2	6	2	2	2	0.0240591	unaffected pathogenicity	Invasive pulmonary aspergillosis	Rodents	Mus musculus (related: house mouse)	Pubmed	30862750	10.1128/mBio.02563-18	2019
PHI:6241	64	1	1	0	2	1	1	2	2	1	1	0	2	1	2	1	4	2	1	2	2	4	2	2	3	2	2	2	2	4	2	2	2	3	1	1	1	0.0240595	reduced virulence	Fungal meningitis	Rodents	Mus musculus (related: house mouse)	Pubmed	27118799	10.1093/mmy/myw013	2016
PHI:139	76	1	1	1	2	3	1	2	2	3	1	1	1	3	3	2	4	3	1	2	2	5	3	3	2	2	2	2	2	4	2	2	2	3	1	1	1	0.0257745	reduced virulence	Cryptococcosis	Rodents	Mus musculus (related: house mouse)	PubMed	10482503	no data found	1999
PHI:9274	31	0	0	0	0	0	0	0	1	0	0	0	1	1	1	1	2	0	1	0	1	2	1	1	1	1	1	1	1	2	1	2	2	3	1	1	1	0.0262566	reduced virulence	Disseminated candidiasis	Rodents	Mus musculus (related: house mouse)	Pubmed	31138567	10.1128/AAC.00886-19	2019
PHI:3794	22	0	0	0	0	0	0	0	0	0	1	1	1	1	1	1	1	0	1	1	1	1	1	1	0	1	1	1	1	1	1	0	0	0	1	1	1	0.027652	increased virulence (hypervirulence)	Disseminated candidiasis	Rodents	Mus musculus (related: house mouse)	Pubmed	23720756	10.1074/jbc.M113.478743	2013
PHI:2536	27	0	0	0	0	0	1	1	0	0	1	1	0	0	1	0	2	1	0	1	1	2	1	1	0	1	1	1	1	2	1	0	1	2	1	1	1	0.0301003	unaffected pathogenicity	Invasive pulmonary aspergillosis	Rodents	Mus musculus (related: house mouse)	Pubmed	17352532	10.1371/journal.ppat.0030024	2007
PHI:8540	23	0	0	0	0	1	0	0	0	1	0	0	0	0	1	0	1	1	1	1	1	1	1	1	0	1	1	1	1	2	1	1	1	1	1	0	1	0.0309516	reduced virulence	Nosocomial infection	Primates	Homo sapiens (related: human)	Pubmed	30335810	10.1371/journal.pone.0205787	2018
PHI:8508	37	2	2	2	2	2	1	2	2	2	1	1	2	1	1	0	2	1	0	1	1	2	1	1	2	0	0	0	0	0	0	0	0	0	1	1	1	0.031069	reduced virulence	Chronic septicemia	Birds	Anas platyrhynchos (related: mallard)	Pubmed	30279476	10.1038/s41598-018-32905-1	2018
PHI:3290	34	2	2	2	1	0	0	2	1	0	0	0	1	1	0	2	3	0	2	2	2	2	0	0	0	0	1	0	1	0	0	2	1	1	1	1	1	0.0314356	reduced virulence	Urinary tract infection	Rodents	Mus musculus (related: house mouse)	Pubmed	25240873	10.1016/j.ijmm.2014.08.013	2014
PHI:9843	37	1	1	0	1	1	1	1	1	1	1	1	1	1	1	1	1	1	1	1	1	2	1	1	1	1	1	1	1	1	1	1	1	2	1	1	1	0.0315953	unaffected pathogenicity	Infection	Flies	Drosophila melanogaster (related: fruit fly)	Pubmed	30224439	10.1128/JB.00380-18	2018
PHI:6467	24	0	0	0	0	0	1	0	0	1	1	1	0	1	1	1	1	0	1	0	1	2	1	1	0	1	1	1	1	1	1	1	1	2	0	0	0	0.0340331	unaffected pathogenicity	Disseminated candidiasis	Rodents	Mus musculus (related: house mouse)	Pubmed	27382059	10.1074/jbc.M115.706044	2016
PHI:8600	48	2	2	2	2	2	1	2	2	2	1	1	2	0	1	1	0	1	2	1	1	1	1	1	3	1	1	1	1	1	1	0	1	4	1	1	1	0.0351894	unaffected pathogenicity	Fungal meningitis	Rodents	Mus musculus (related: house mouse)	Pubmed	30459196	10.1128/mBio.02087-18	2018
PHI:4692	15	1	1	1	1	1	0	1	0	0	1	1	0	0	0	0	2	0	0	1	1	2	0	0	0	0	0	0	0	0	0	0	0	1	0	0	0	0.0353647	reduced virulence	Listeriosis	Rodents	Mus musculus (related: house mouse)	Pubmed	25157076	10.1128/JB.02053-14	2014
PHI:6913	33	0	0	0	0	1	1	1	0	1	1	1	2	1	0	0	3	2	0	0	1	4	0	0	0	1	1	1	1	1	0	2	2	2	1	1	1	0.0361942	reduced virulence	Urinary tract infection	Rodents	Mus musculus (related: house mouse)	Pubmed	26883590	10.1128/IAI.01211-15	2016
PHI:11158	24	1	5	1	1	1	1	1	0	1	1	1	1	0	0	0	1	0	1	0	1	1	0	0	0	1	1	0	0	0	0	0	0	0	1	1	1	0.036347	reduced virulence	Cryptococcosis	Rodents	Mus musculus (related: house mouse)	Pubmed	33224112	10.3389/fmicb.2020.570269	2020
PHI:8494	2	0	0	1	0	0	0	0	0	0	0	0	0	0	0	0	0	0	0	0	0	0	0	0	0	0	1	0	0	0	0	0	0	0	0	0	0	0.0365255	increased virulence (hypervirulence)	Invasive pulmonary aspergillosis	Primates	Homo sapiens (related: human)	Pubmed	30286953	10.1016/j.bbrc.2018.09.157	2018
PHI:2358	2	0	0	1	0	0	0	0	0	0	0	0	0	0	0	0	0	0	0	0	0	0	0	0	0	0	1	0	0	0	0	0	0	0	0	0	0	0.0365255	reduced virulence	Invasive pulmonary aspergillosis	Rodents	Mus musculus (related: house mouse)	Pubmed	22083709	10.1128/IAI.05830-11	2011
PHI:7933	7	1	0	1	0	0	0	0	0	0	0	0	1	0	0	0	0	0	0	0	0	0	0	0	1	0	0	0	0	1	0	0	0	0	0	1	1	0.0369247	reduced virulence	Disseminated candidiasis	Primates	Homo sapiens (related: human)	Pubmed	29491142	10.1074/jbc.M117.813741	2018
PHI:2825	15	1	1	1	1	1	1	0	2	1	0	0	1	0	0	1	0	0	0	1	0	0	0	0	1	0	0	0	0	0	0	0	0	0	0	1	1	0.037204	reduced virulence	Disseminated candidiasis	Rodents	Mus musculus (related: house mouse)	Pubmed	16629671	10.1111/j.1365-2958.2006.05121.x	2006
PHI:7755	15	1	1	1	1	1	1	1	1	1	1	1	1	1	0	0	0	0	0	1	0	0	0	0	1	0	0	0	0	0	0	0	0	0	0	0	0	0.0377943	unaffected pathogenicity	Pulmonary aspergillosis	Rodents	Mus musculus (related: house mouse)	Pubmed	29170805	10.1007/s00294-017-0777-5	2017
PHI:7492	15	1	1	1	1	1	0	1	1	1	0	0	1	1	0	1	1	0	1	0	1	0	0	0	1	0	0	0	0	0	0	0	0	0	0	0	0	0.0377943	unaffected pathogenicity	Pneumonia	Rodents	Mus musculus (related: house mouse)	Pubmed	28861522	10.1128/mSphere.00341-17	2017
PHI:9164	15	1	1	1	1	1	0	0	0	1	0	0	1	0	1	1	1	0	1	1	0	1	1	1	0	0	0	0	0	0	0	0	0	0	0	0	0	0.0377943	reduced virulence	Periodontitis	Primates	Homo sapiens (related: human)	Pubmed	31081181	10.1002/jcb.28887	2019
PHI:9246	26	0	0	0	1	0	0	0	0	0	1	1	1	1	1	1	0	1	0	1	0	0	1	1	0	1	1	1	1	2	1	0	1	1	2	2	2	0.0394025	reduced virulence	Salmonellosis	Primates	Homo sapiens (related: human)	Pubmed	29306008	10.1016/j.micpath.2017.12.072	2018
PHI:4733	38	0	0	0	1	1	0	1	0	1	0	0	0	0	3	0	1	2	0	0	1	2	3	3	0	1	1	1	1	3	2	1	1	2	2	2	2	0.0411104	unaffected pathogenicity	Tularemia	Rodents	Mus musculus (related: house mouse)	Pubmed	25999917	10.3389/fmicb.2015.00338	2015
PHI:7207	195	6	6	6	5	5	5	4	5	6	5	5	5	4	5	5	9	4	5	4	5	9	5	5	7	5	5	5	5	10	5	3	5	10	4	4	4	0.0429522	unaffected pathogenicity	Fungal meningitis	Rodents	Mus musculus (related: house mouse)	Pubmed	28559486	10.1128/mBio.00595-17	2017
PHI:6444	23	0	0	0	0	0	1	0	1	0	0	0	0	0	1	0	2	1	0	0	1	1	1	1	1	1	0	1	1	1	1	1	1	2	1	1	1	0.0446816	reduced virulence	Invasive pulmonary aspergillosis	Rodents	Mus musculus (related: house mouse)	Pubmed	27438017	10.1371/journal.pone.0158724	2016
PHI:2322	60	1	1	1	1	1	0	2	1	1	1	1	2	1	2	2	2	2	2	2	1	2	2	2	1	2	2	2	2	3	2	1	2	4	2	2	2	0.0448047	reduced virulence	Aspergillosis	Rodents	Mus musculus (related: house mouse)	Pubmed	22106303	10.1073/pnas.1106399108	2011
PHI:9425	207	3	3	2	2	6	2	4	5	4	9	7	4	7	3	3	12	3	5	13	8	13	3	3	3	6	8	7	5	8	5	2	3	9	9	9	9	0.0458096	reduced virulence	Cryptococcal meningitis	Rodents	Mus musculus (related: house mouse)	Pubmed	31311883	10.1128/mBio.01440-19	2019
PHI:4844	71	1	1	1	2	2	2	2	3	2	3	4	2	2	1	1	4	1	2	2	2	4	1	1	4	2	2	1	2	1	1	3	2	4	1	1	1	0.0473459	reduced virulence	Mucormycosis	Rodents	Mus musculus (related: house mouse)	Pubmed	25974051	10.1371/journal.ppat.1004842	2015
Note: Retain the "Birds","Bony fishes","Flies","Nematodes","Primates","Rabbits & hares","Rodents" from the host description.
